# Supplementary material for: Mitochondrial genome transfer drives metabolic reprogramming in adjacent colonic epithelial cells promoting TGFβ1-mediated tumor progression
Source: PubMed Central journal article supplement (PMC11061154; doi:10.1038/s41467-024-48100-y), 2024-04-30
Supplement: 41467_2024_48100_MOESM1_ESM.pdf [file 41467_2024_48100_MOESM1_ESM.pdf]

**Supplementary information for:**

**Mitochondrial genome transfer drives metabolic reprogramming in adjacent colonic epithelial cells promoting TGF $\beta$ 1-mediated tumor progression**

Bingjie Guan, Youdong Liu, Bowen Xie, Senlin Zhao, Abudushalamu Yalikun, Weiwei Chen, Menghua Zhou, Qi Gu, and Dongwang Yan

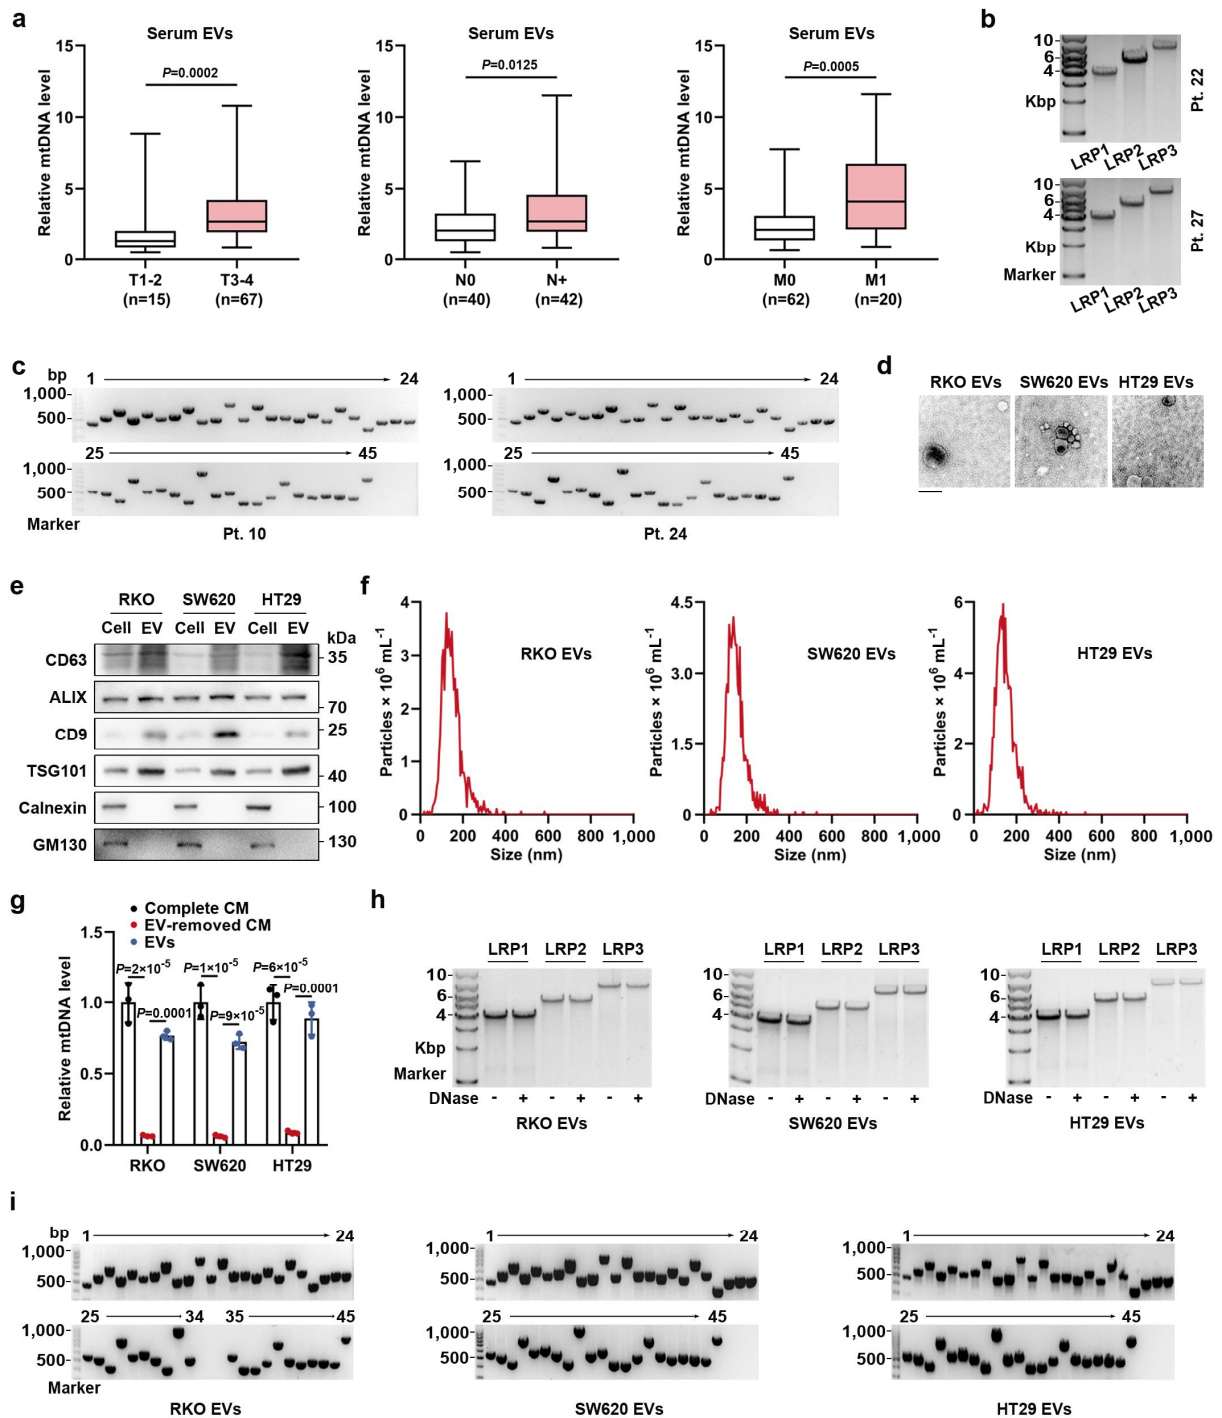

**Supplementary Fig. 1. Complete mtDNA is abundant in EVs derived from CC cells.** **a** The relative mtDNA levels in serum EVs from CC patients with different TNM stages were determined by qPCR targeting the ND1 gene. **b** Representative agarose gel electrophoresis pictures of long-range PCR with three amplicons covering the entire mtDNA obtained from serum EVs of patient 22 and patient 27. **c** Representative gel electrophoresis images of 45

overlapping amplicons encoding the whole mtDNA isolated from serum EVs of patient 10 and patient 24. **d-f** Identification of EVs derived from RKO, SW620, or HT29 cells via **(d)** electron microscopy, **(e)** immunoblotting, and **(f)** nanoparticle tracking analysis. The samples derive from the same experiment but different gels for GM130, ALIX, another for Calnexin, TSG101, and CD9, and another for CD63 were processed in parallel. Scale bar, 200 nm. **g** The levels of mtDNA in CC cell-derived total CM, EV-removed CM, and corresponding isolated EVs were examined by qPCR.  $n = 3$  independent experiments. **h** Representative agarose gel electrophoresis pictures of long-range PCR using three amplicons covering the entire mtDNA isolated from CC cell-derived EVs pre-treated with or without DNase. **i** Representative gel electrophoresis images of 45 overlapping amplicons encoding the whole mtDNA purified from CC cell-derived EVs. Data are means  $\pm$  SD. The boxplots indicate median (center), 25th and 75th percentiles (bounds of box), and 2.5th and 97.5th percentiles (whiskers). Two-sided Mann-Whitney test **(a)**. One-way ANOVA with Tukey's multiple comparisons test **(g)**. Source data are provided as a Source Data file.

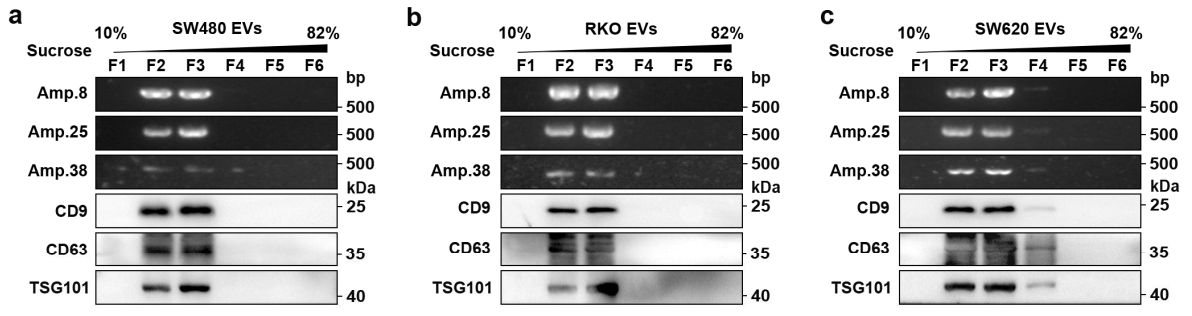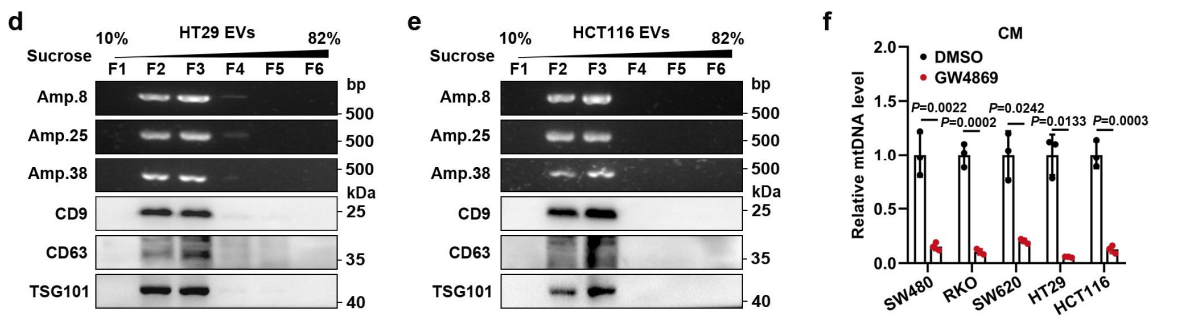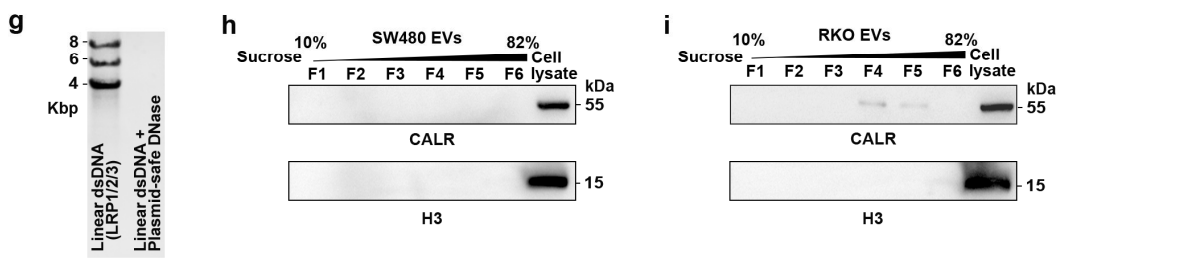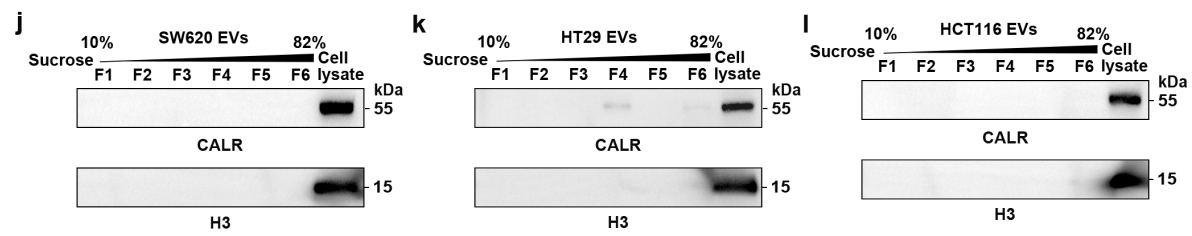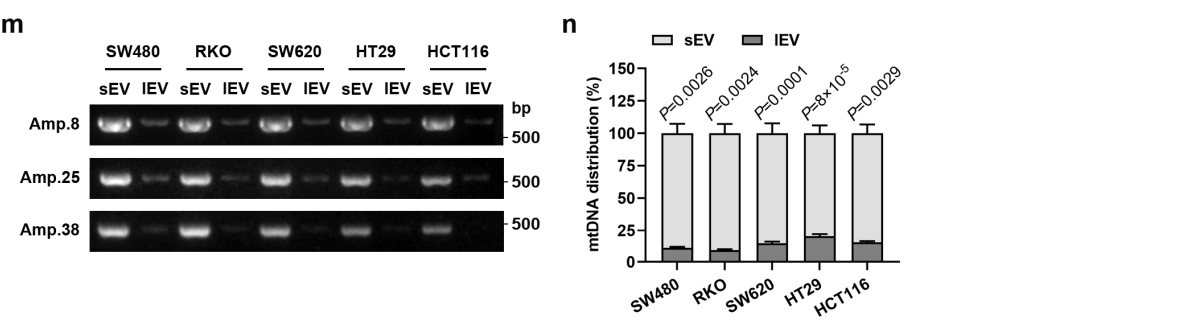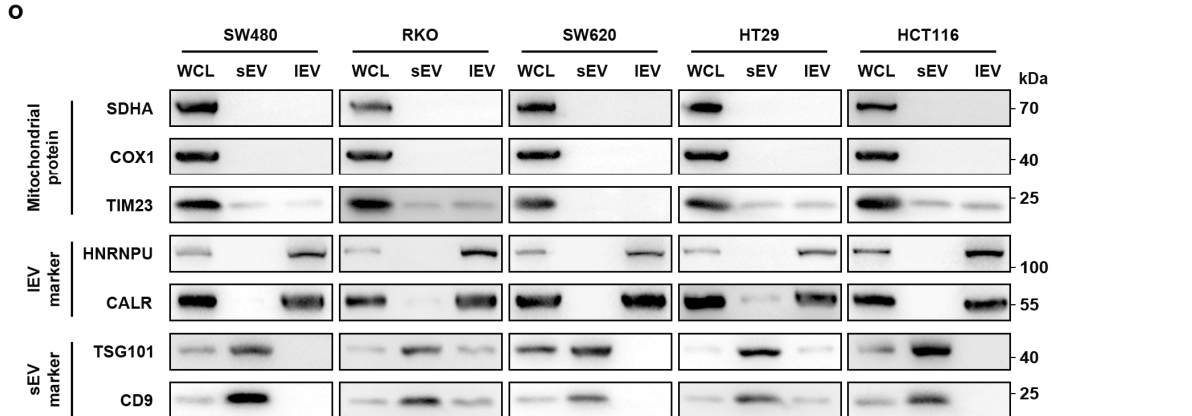



**Supplementary Fig. 2. Characterization of the CC cell-derived EVs.** **a-e** EVs derived from CC cells were separated on a sucrose gradient. Immunoblotting and gel electrophoresis analysis were used to determine the relative levels of sEV markers and mtDNA among the fractions. The samples were derived from the same experiment and processed on the same gel. **f** qPCR analysis was used to evaluate the relative levels of mtDNA secreted by DMSO- or GW4869-treated CC cells. n = 3 independent experiments. **g** The linear products of long-range PCR were used to verify the degradative activity of plasmid-safe DNase toward linear dsDNA. **h-l** Immunoblotting of EV proteins in a sucrose gradient for contamination markers. The samples were derived from the same experiment and processed on the same gel. **m, n** The mtDNA content in sEVs and lEVs was compared by (**m**) gel electrophoresis and (**n**) qPCR analysis. n = 3 independent experiments. **o** Immunoblotting was employed to detect the indicated proteins in sEVs and lEVs. The samples derive from the same experiment but different gels for SDHA, COX1, and TIM23, another for HNRNPU, CALR, TSG101, and CD9 were processed in parallel. WCL, whole cell lysate. Data are means  $\pm$  SD. Two-tailed t test (**f, n**). Source data are provided as a Source Data file.

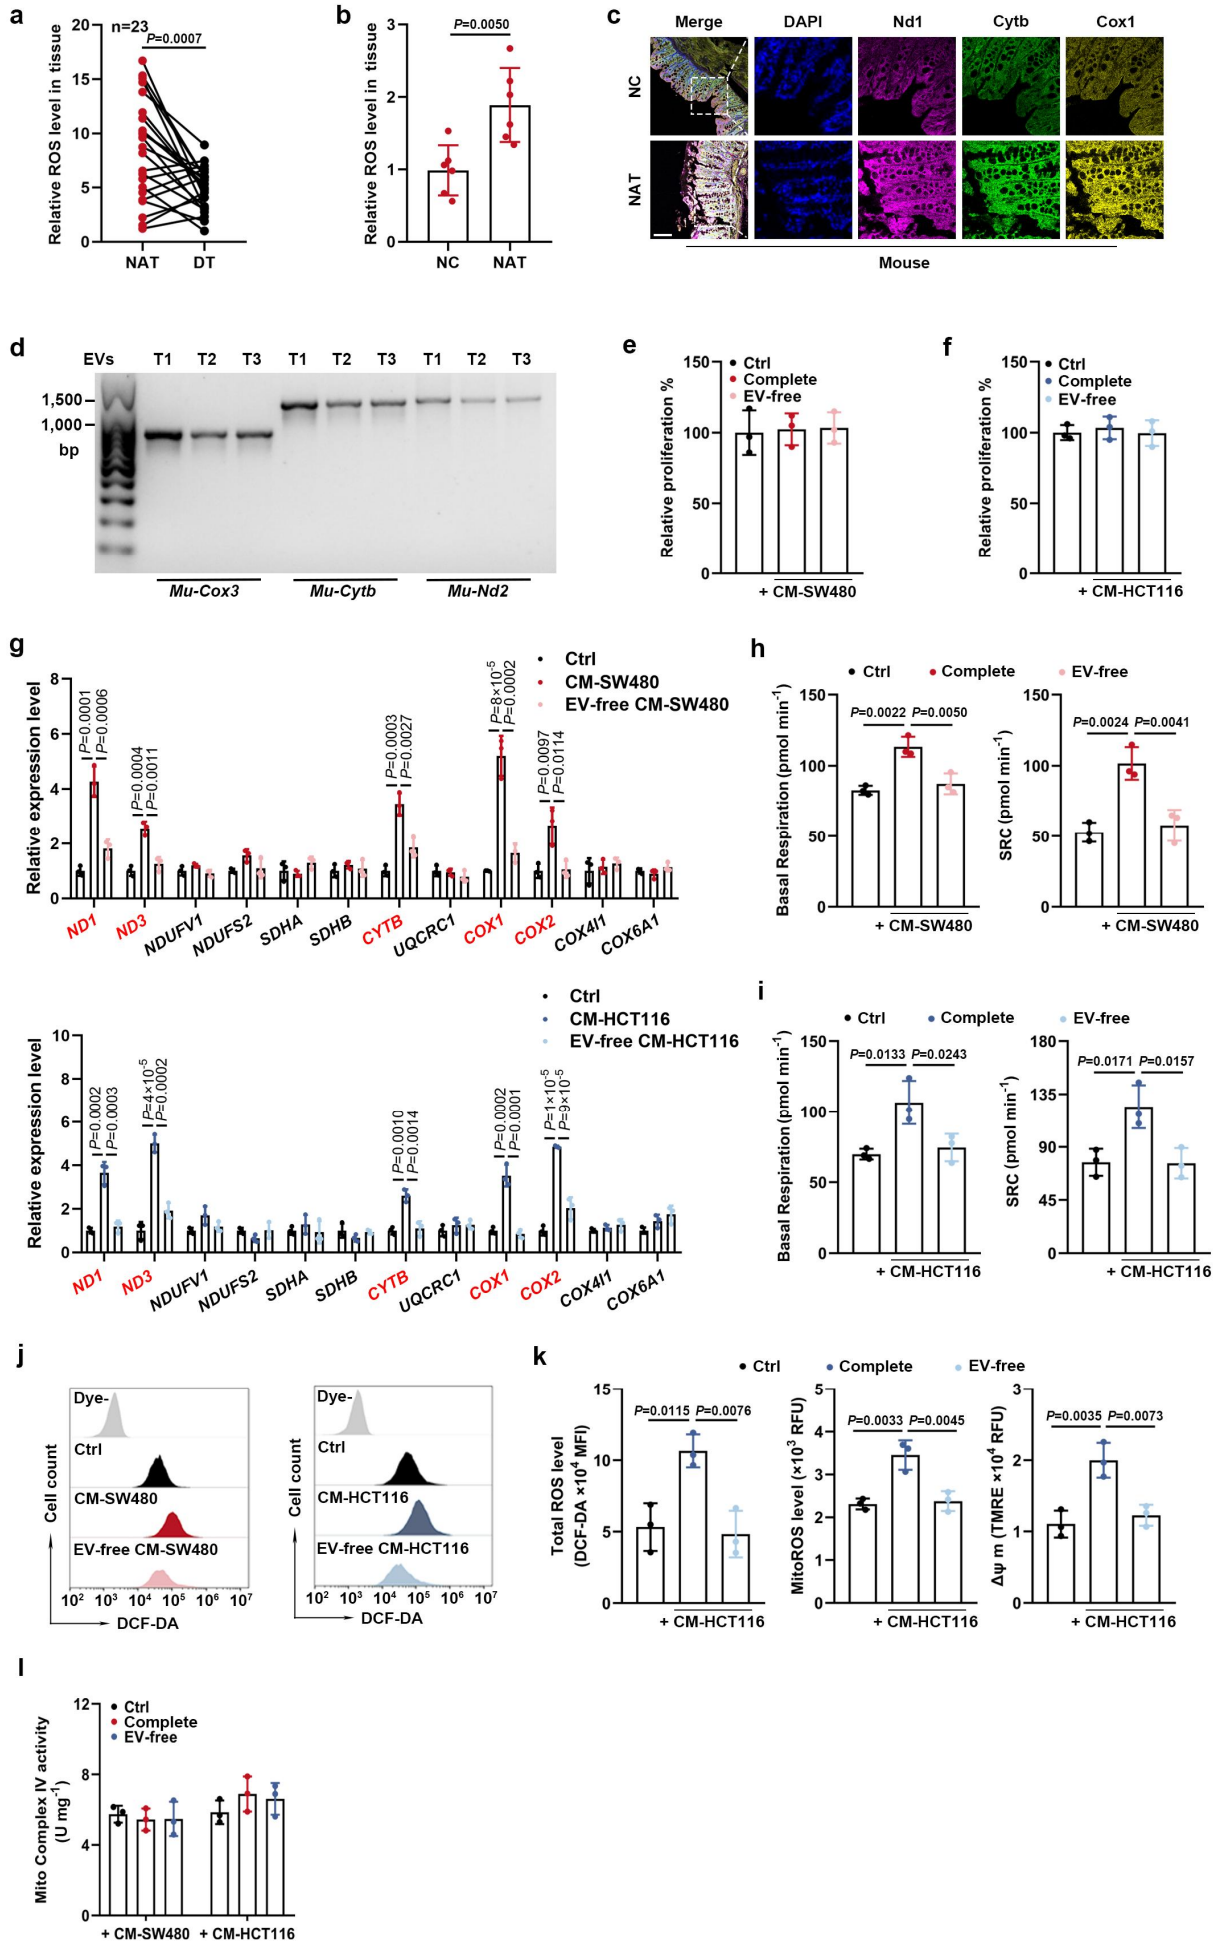

**Supplementary Fig. 3. CECs display increased OXPHOS upon EV-dependent communication with CC cells.** **a** Comparison of ROS levels in NAT and paired DT samples obtained from CC patients. **b** ROS levels in normal colonic mucosa or NAT acquired from healthy mice (negative control, NC) or the AOM/DSS-induced murine orthotopic CC model. n = 6 mice per group. **c** Representative images of multiplex immunohistochemistry (mIHC) staining for DAPI (blue), Nd1 (magenta), Cytb (green), and Cox1 (yellow) in sections from normal colonic mucosa or NAT acquired from healthy mice or the AOM/DSS-induced murine orthotopic CC model. Scale bar, 100  $\mu$ m. **d** The murine mitochondrial genes in EVs derived from primary murine CC cells were determined. **e, f** Changes in proliferative potential of FHC cells incubated with **(e)** SW480 or **(f)** HCT116 cell-derived complete CM or EV-removed CM. n = 3 independent experiments. **g** Changes in mRNA expression levels of mtDNA-encoded (red) and nuclear-encoded (black) mitochondrial subunits in FHC cells incubated with SW480 or HCT116 cell-derived complete CM or EV-removed CM. n = 3 independent experiments. **h, i** Changes in basal and spare respiratory capacities of FHC cells incubated with **(h)** SW480 or **(i)** HCT116 cell-derived complete CM or EV-removed CM. SRC, spare respiratory capacity. n = 3 independent experiments. **j** Representative flow cytometric plots of total ROS levels in FHC cells educated with SW480 or HCT116 cell-derived complete CM or EV-free CM. **k** Changes in total/mitochondrial ROS levels and mitochondrial membrane potential ( $\Delta\Psi$  m) in FHC cells incubated with HCT116-derived complete CM or EV-free CM. n = 3 independent experiments. **l** Changes in activities of mitochondrial complex IV in FHC cells incubated with SW480 or HCT116 cell-derived complete CM or EV-removed CM. n = 3 independent experiments. Data are means  $\pm$  SD. Paired t test **(a)**. Two-tailed t test **(b)**. One-way ANOVA with Tukey's multiple comparisons test **(e-i, k, and l)**. Source data are provided as a Source Data file.

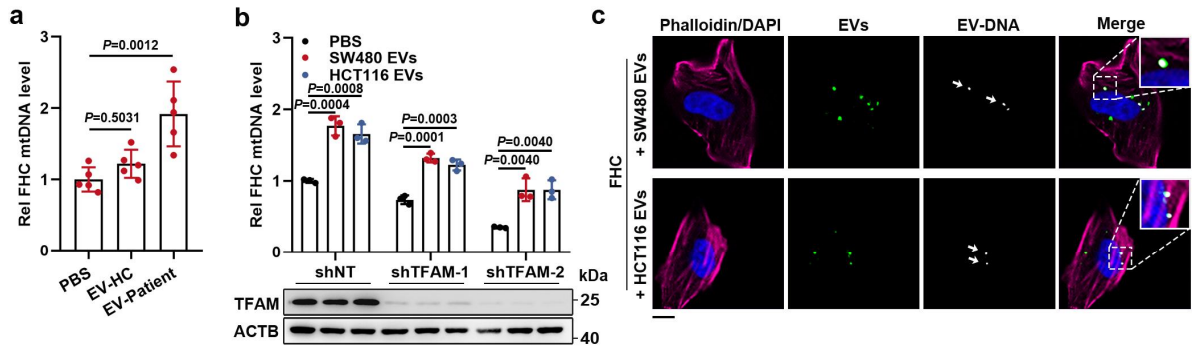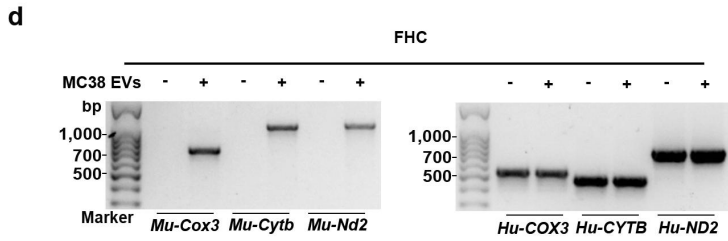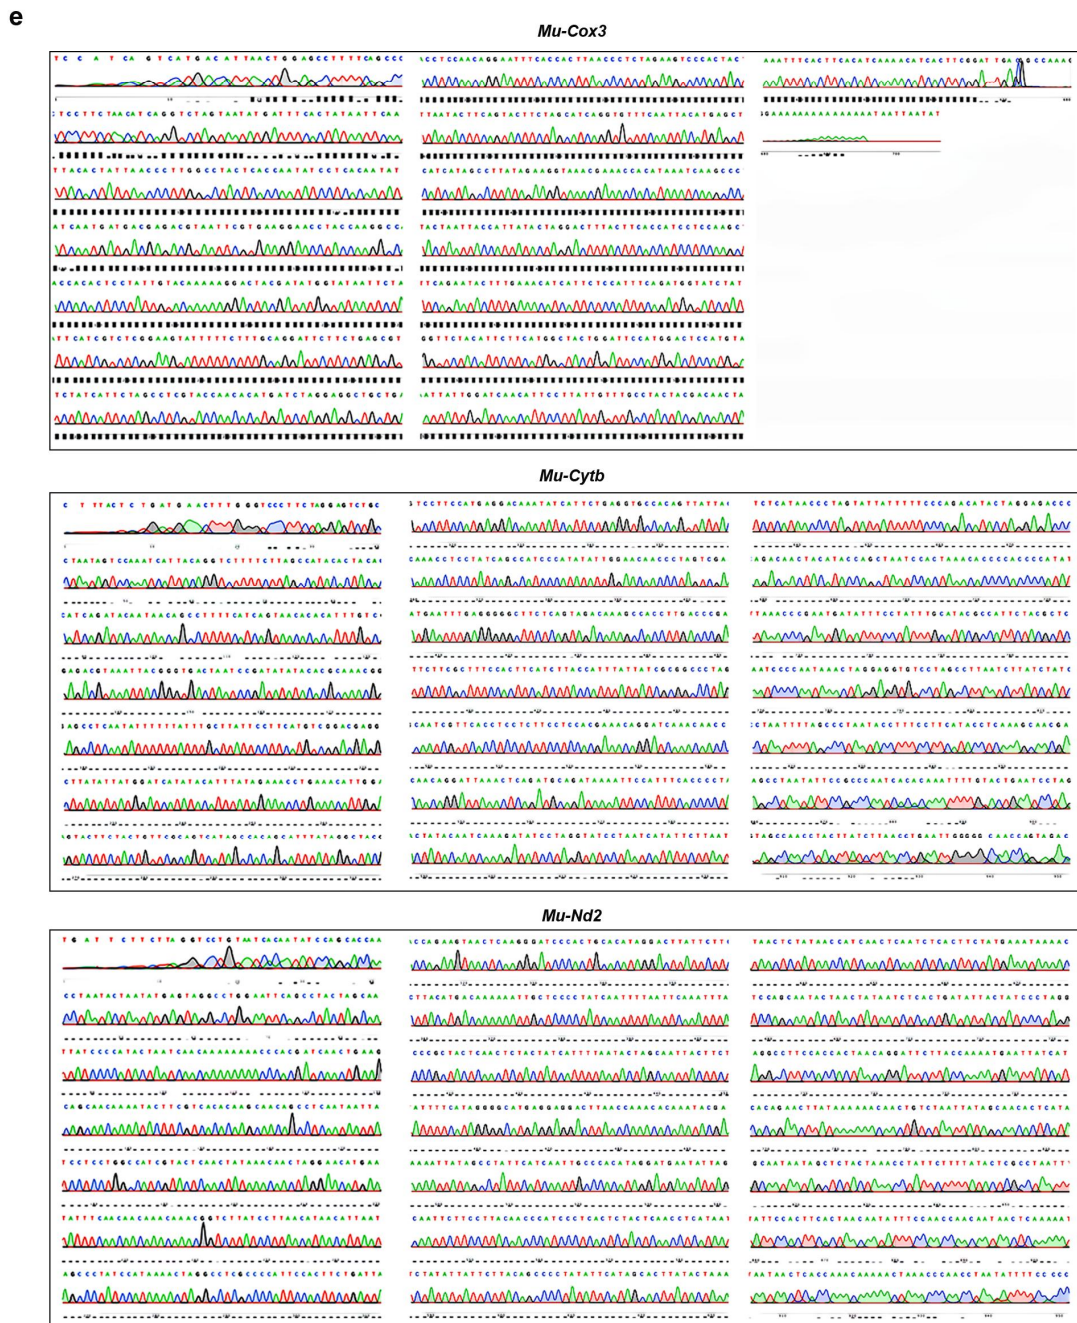

**Supplementary Fig. 4. Transfer of exogenous mtDNA into CECs via CC cell-derived EVs.** **a** FHC cells were educated with EVs derived from healthy control (HC) or CC patient serum, followed by determination of the intracellular mtDNA levels. Rel, relative. n = 5 independent experiments. **b** FHC cells stably expressing shNT or shTFAM were educated with EVs derived from SW480 or HCT116, followed by detection of the intracellular mtDNA content. Rel, relative. The samples were derived from the same experiment and processed on the same gel. n = 3 biological replicates. **c** Transfer of EV-DNA derived from SW480 or HCT116 cells into FHC cells was examined by confocal microscopy. Phalloidin (magenta)/DAPI (blue), EVs (green), EV-DNA (white). Scale bar, 10  $\mu$ m. **d** The murine and human mitochondrial genes in FHC cells were determined, in the presence or absence of education with MC38-derived EVs. **e** After education with MC38-derived EVs, the murine mitochondrial genes observed in FHC cells were further confirmed by Sanger sequencing. Data are means  $\pm$  SD. One-way ANOVA with Tukey's multiple comparisons test. Source data are provided as a Source Data file.



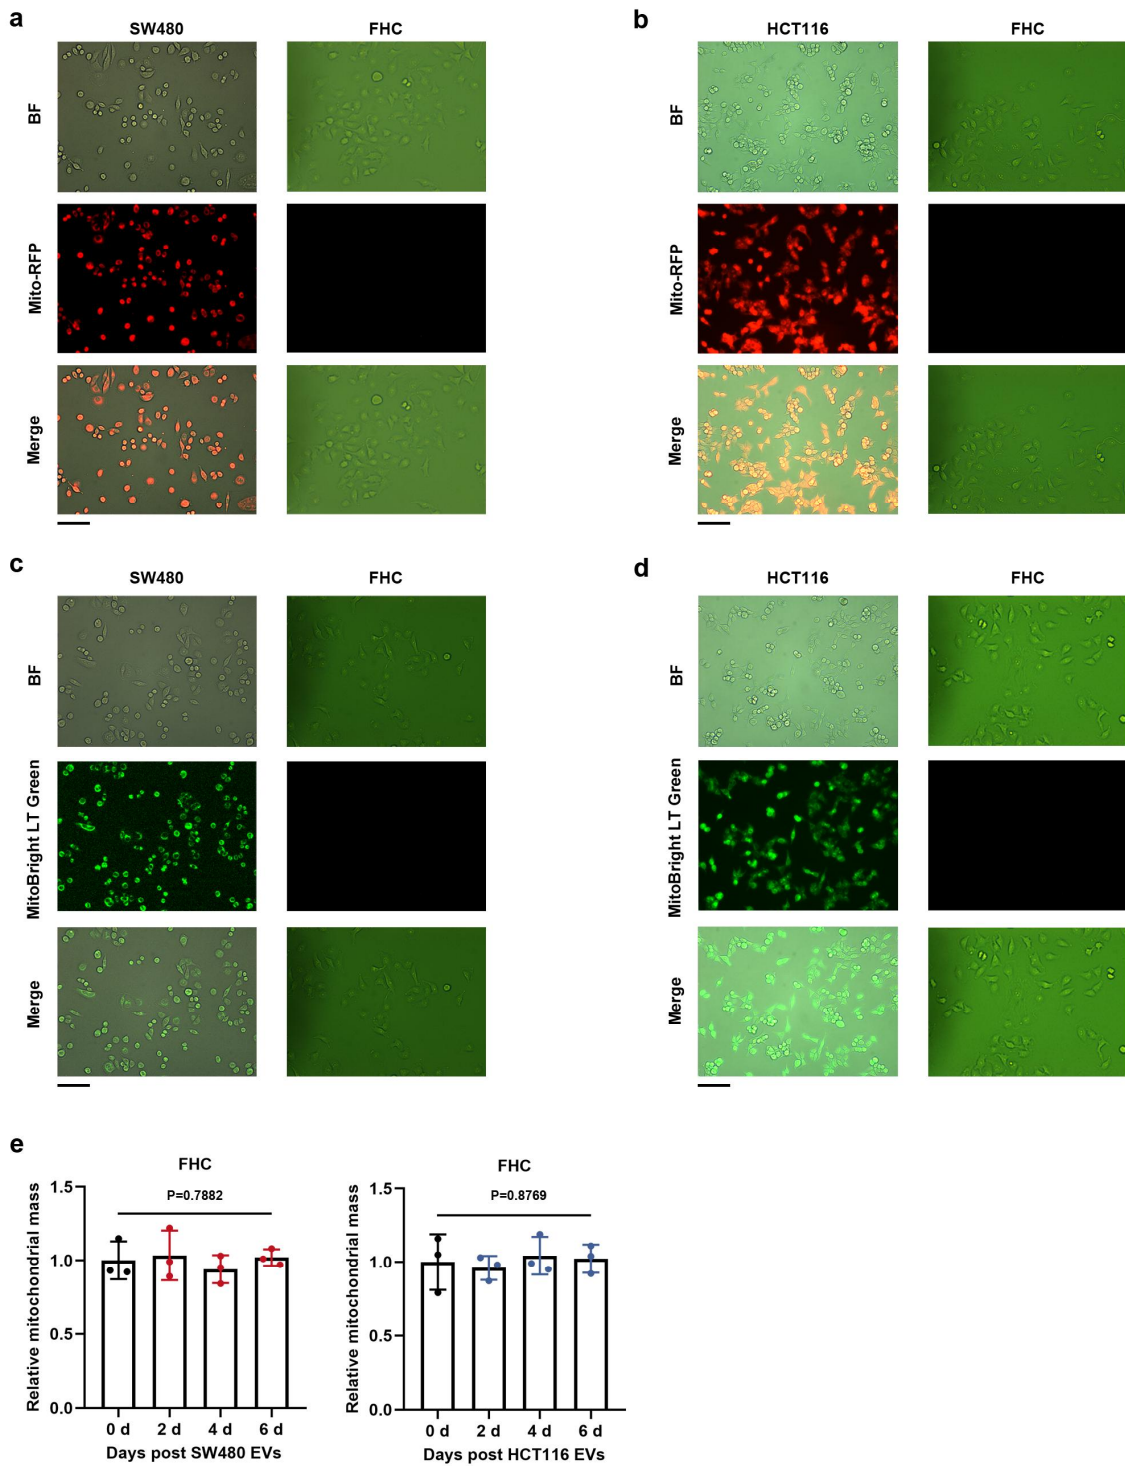

**Supplementary Fig. 5. Tumor cells were tested for transport of intact mitochondria to CECs. a, b** FHC cells were co-cultured with Mito-RFP-labelled (a) SW480 or (b) HCT116 cells for four days. Mitochondrial fluorescence was then measured in each cell line. Scale bar, 100  $\mu$ m. **c, d** FHC cells were co-cultured with MitoBrightLT Green-labelled (c) SW480 or (d)

HCT116 cells for four days, followed by the detection of mitochondrial fluorescence in each cell line. Scale bar, 100  $\mu\text{m}$ . **e** Determination of mitochondrial mass levels in FHC cells educated with EVs derived from CC cell lines.  $n = 3$  independent experiments. Data are means  $\pm$  SD. One-way ANOVA with Tukey's multiple comparisons test. Source data are provided as a Source Data file.

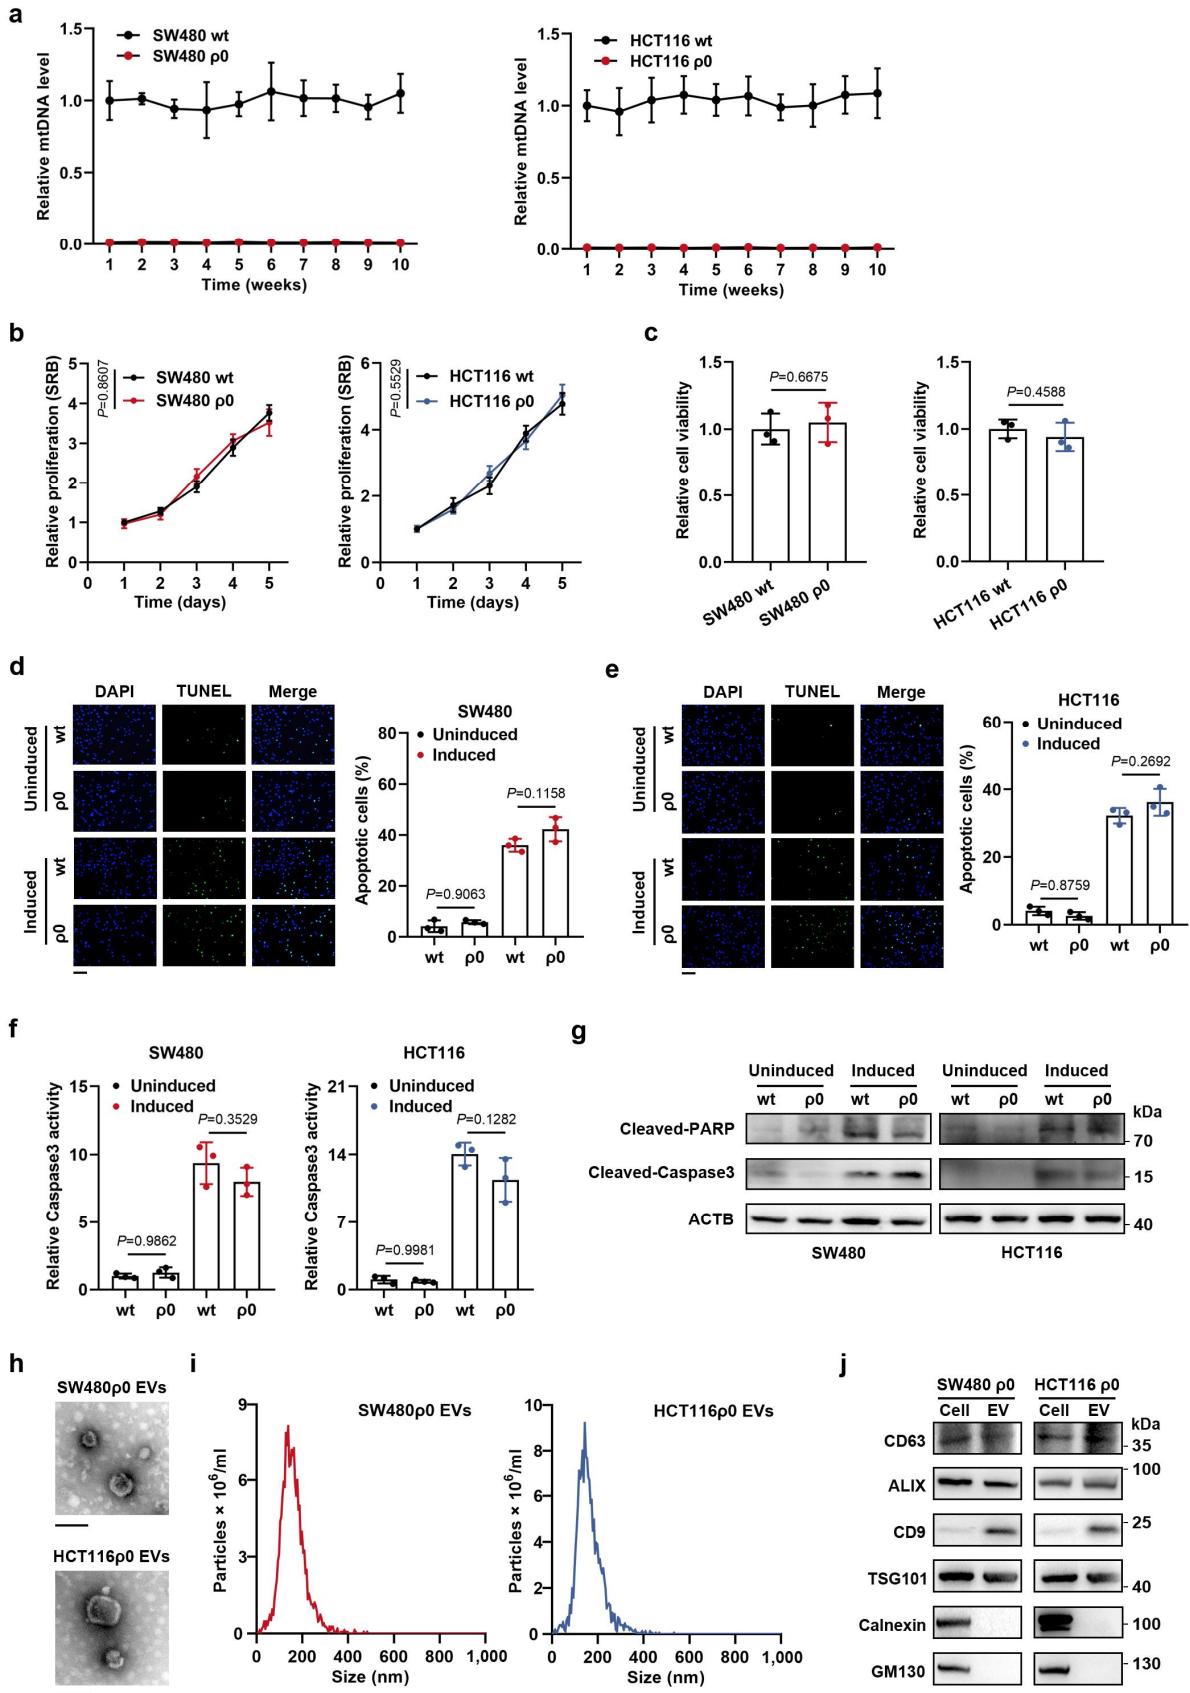



**Supplementary Fig. 6. Identification of  $\rho 0$  cells and their derived EVs.** **a** Detection of the stability of mtDNA content in wild-type or mtDNA-depleted SW480 and HCT116 cells.  $n = 3$  independent experiments. **b, c** Assessment of **(b)** proliferation potential and **(c)** cell viability of wild-type SW480, HCT116, and their  $\rho 0$  cells.  $n = 3$  independent experiments. **d-g** The indicated cells were treated with either vehicles or apoptosis inducers. The following measurements were conducted to examine cell apoptosis: **(d, e)** apoptotic cell ratio, **(f)** Caspase3 activity, and **(g)** apoptosis-related protein levels. The samples were derived from the same experiment and processed on the same gel. Scale bar, 100  $\mu\text{m}$ .  $n = 3$  independent experiments. **h-j** Identification of EVs derived from  $\rho 0$  cells via **(h)** electron microscopy, **(i)** nanoparticle tracking analysis, and **(j)** immunoblotting. The samples derive from the same experiment but different gels for TSG101, CD9, another for Calnexin, CD63, and another for GM130, ALIX were processed in parallel. Scale bar, 100 nm. Data are means  $\pm$  SD. Two-sided two-way ANOVA **(b)**. Two-tailed t test **(c)**. One-way ANOVA with Tukey's multiple comparisons test **(d-f)**. Source data are provided as a Source Data file.

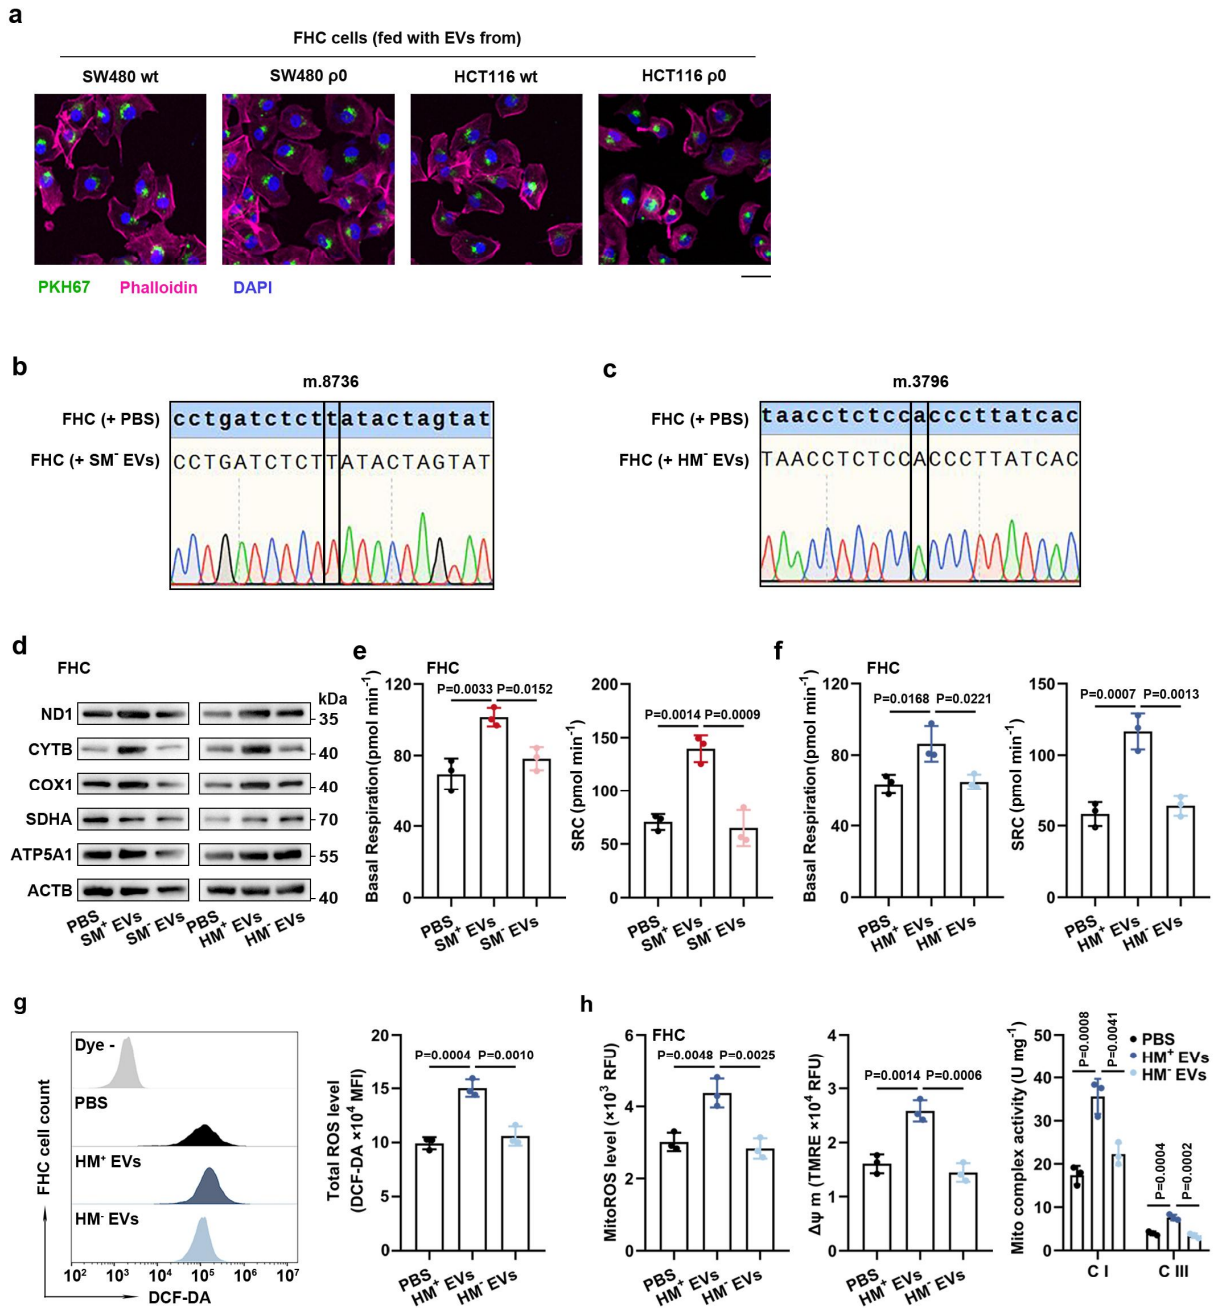

**Supplementary Fig. 7. EV-mtDNA transfer results in improved OXPHOS in CECs. a**

Detection of uptake efficiency of EVs derived from  $\rho 0$  or wild-type CC cells by FHC cells.

Scale bar, 40  $\mu$ m. **b, c** Sanger sequencing was performed to detect CC cell-type point mutations in mtDNA purified from FHC cells educated with **(b)** SW480  $\rho 0$ - or **(c)** HCT116

$\rho 0$ -derived EVs. **d** Changes in expression levels of mtDNA-encoded proteins (ND1, CYTB, and COX1) and nuclear DNA-encoded mitochondrial proteins (SDHA and ATP5A1) in FHC

cells educated with mtDNA-sufficient EVs or mtDNA-depleted EVs. The samples derive

from the same experiment but different gels for SDHA, COX1, and ND1, another for ACTB, ATP5A1, and another for CYTB were processed in parallel. **e, f** Changes in basal and spare respiratory capacities of FHC cells. A fraction of FHC cells were educated with **(e)** SM<sup>+</sup> EVs or SM<sup>-</sup> EVs, and another subset of FHC cells were educated with **(f)** HM<sup>+</sup> EVs or HM<sup>-</sup> EVs. SRC, spare respiratory capacity. n = 3 independent experiments. **g, h** Changes in **(g)** total ROS levels, **(h)** mitochondrial ROS levels,  $\Delta\Psi$  m, and activities of mitochondrial complex I and III in FHC cells educated with HM<sup>+</sup> EVs or HM<sup>-</sup> EVs for 7 days. n = 3 independent experiments. Data are means  $\pm$  SD. One-way ANOVA with Tukey's multiple comparisons test. Source data are provided as a Source Data file.

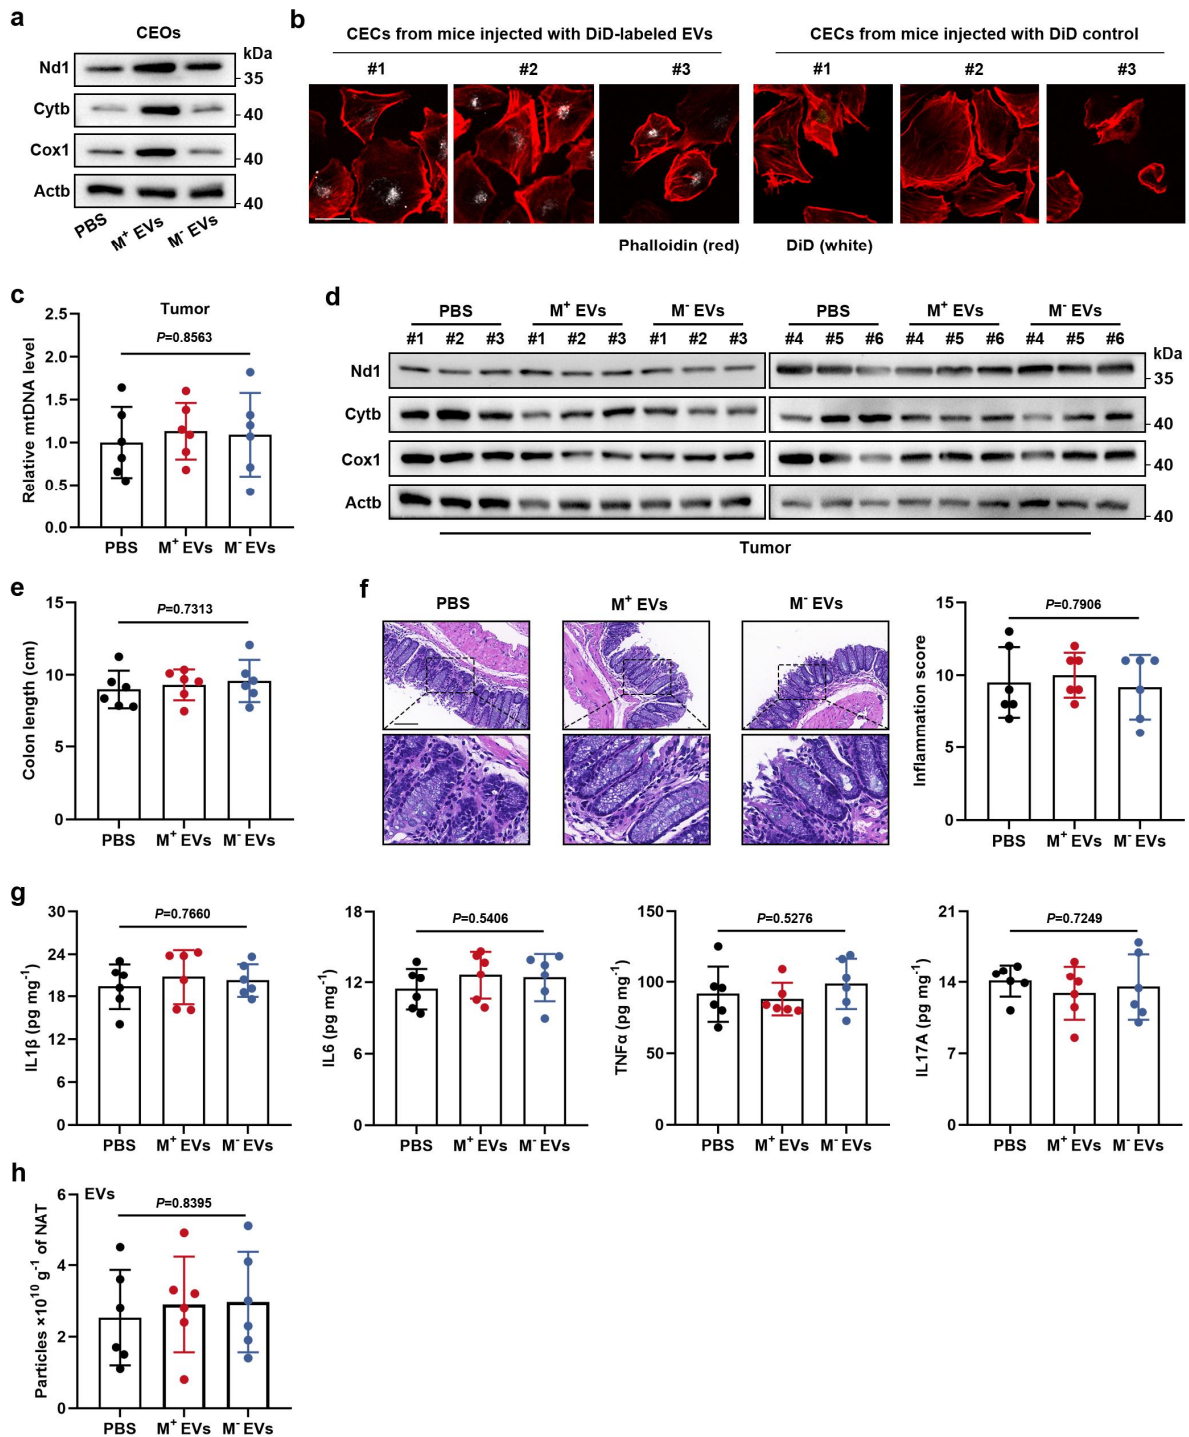

**Supplementary Fig. 8. Exogenous EVs exhibit no significant effect on the mtDNA content of tumors and the level of intestinal inflammation in vivo.** a Changes in expression levels of mtDNA-encoded proteins in murine colonic epithelial organoids (CEOs) educated with mtDNA-sufficient EVs or mtDNA-depleted EVs. The samples derive from the same experiment but different gels for Cox1, Nd1, another for Actb, and another for Cytb

were processed in parallel. **b** The uptake of MC38 cell-derived DiD-labelled EVs by CECs from murine colon tissues was detected by confocal microscopy. Scale bar, 30  $\mu\text{m}$ . **c, d** qPCR and immunoblotting analysis of **(c)** mtDNA content and **(d)** levels of mtDNA-encoded proteins in tumors from EV-treated murine orthotopic CC model. The samples derive from the same experiment but different gels for Cox1, another for Cytb, and another for Actb, Ndl were processed in parallel. n = 6 mice per group. **e-g** Inflammation severity of mice treated with mtDNA-sufficient or mtDNA-depleted EVs: **(e)** colon length, **(f)** colonic inflammation score, and **(g)** levels of proinflammatory cytokines in colonic tissue lysates. Scale bar, 100  $\mu\text{m}$ . n = 6 mice per group. **h** EV content in NAT from tumor-bearing mice was detected. n = 6 mice per group. Data are means  $\pm$  SD. One-way ANOVA with Tukey's multiple comparisons test. Source data are provided as a Source Data file.



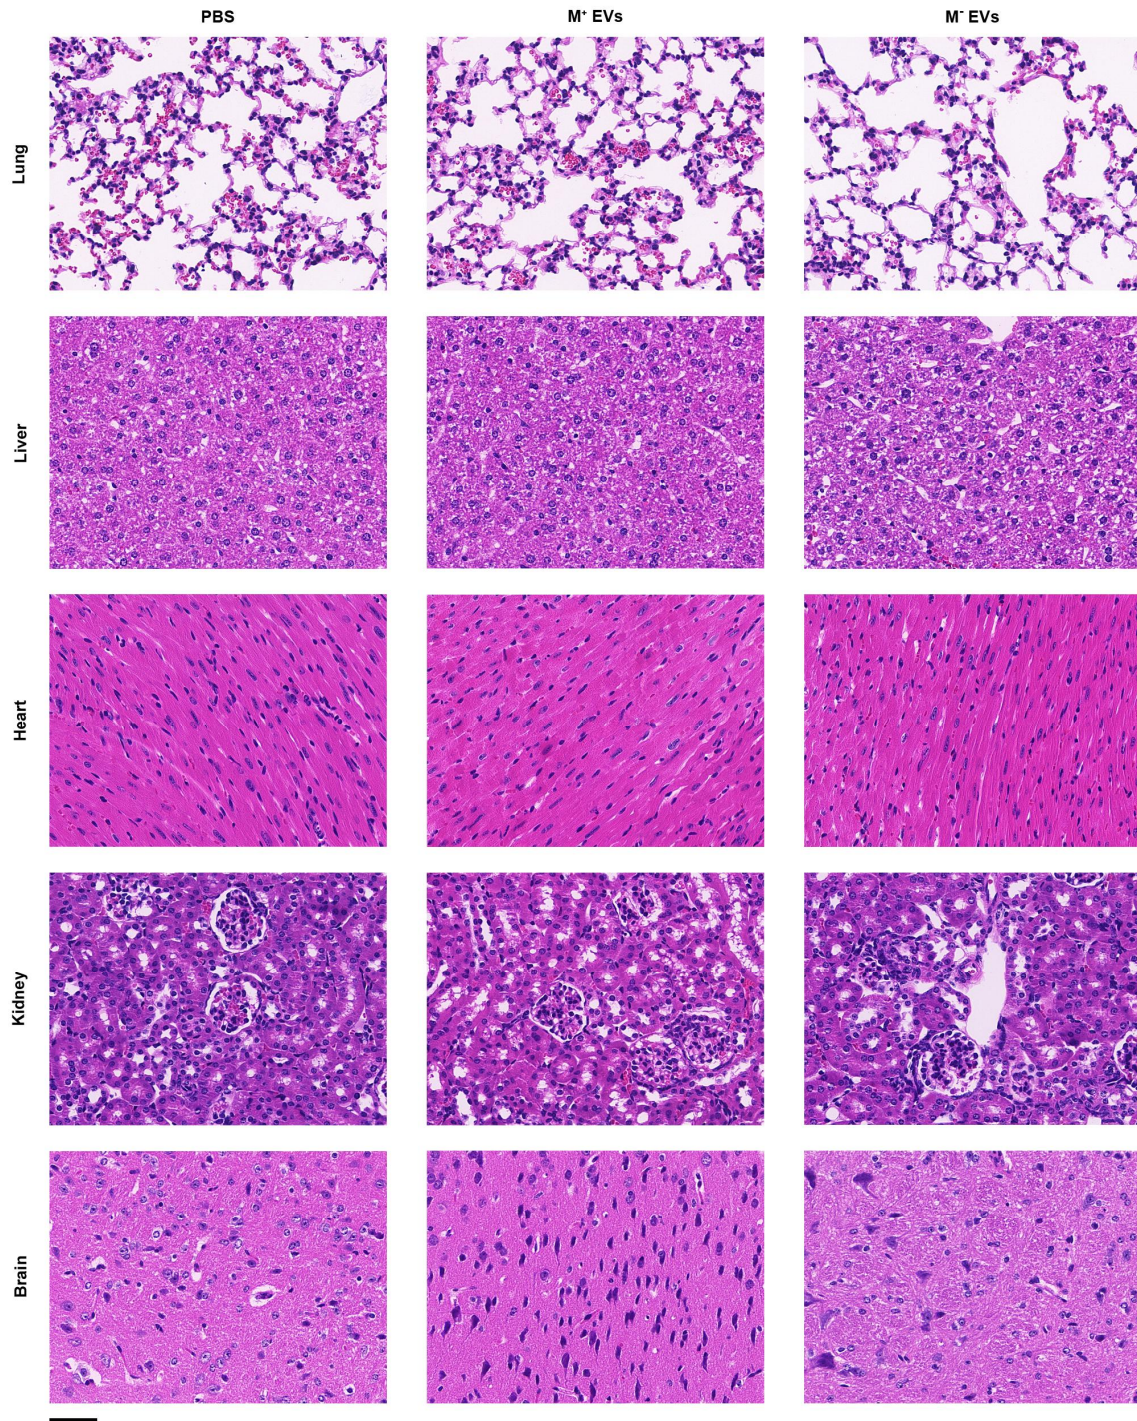

**Supplementary Fig. 9. Exogenous CC cell-derived EVs have no significant effect on extra-intestinal organs.** HE staining was performed for histopathological analysis of lung, liver, heart, kidney, and brain sampled from mice in each group. Scale bar, 50  $\mu$ m. Source data are provided as a Source Data file.



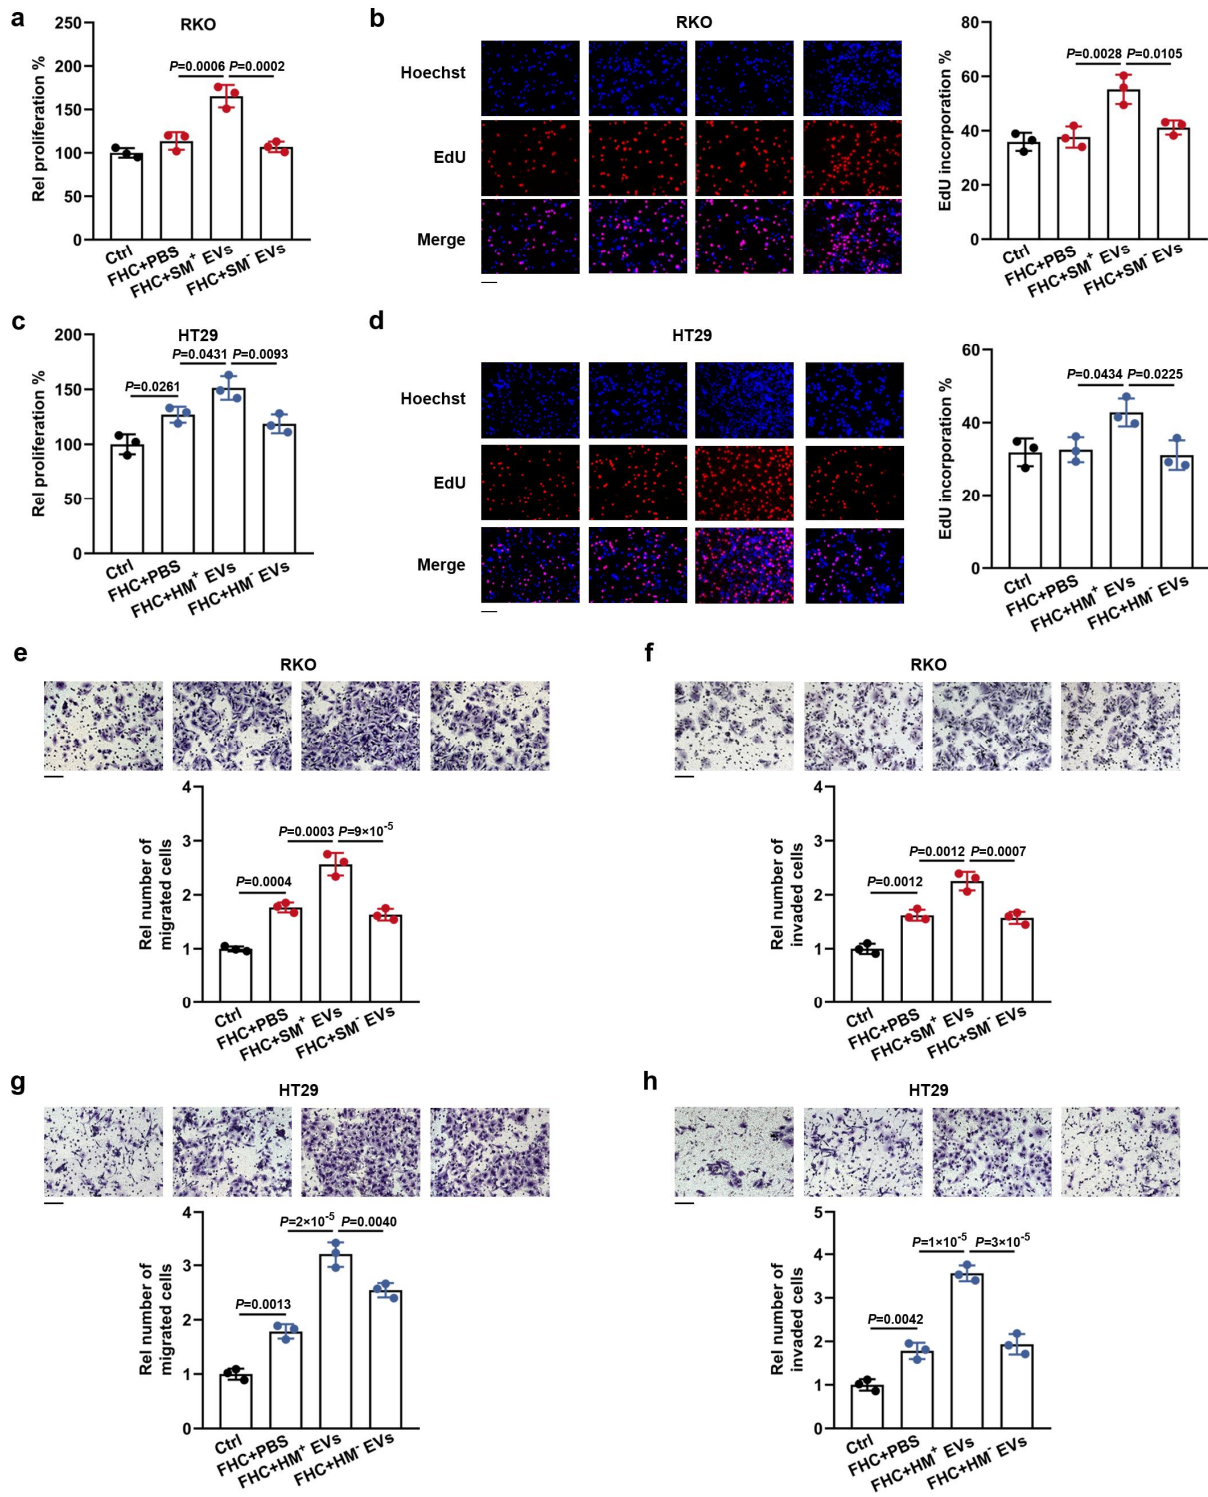

**Supplementary Fig. 10. CECs educated with EV-mtDNA promote tumor progression in return.** **a, b** The effect of FHC cells pre-educated with SM<sup>+</sup> EVs or SM<sup>-</sup> EVs on the proliferation of RKO cells was detected by **(a)** CCK8 and **(b)** EdU assays. Rel, relative. Scale bar, 100  $\mu$ m. n = 3 independent experiments. **c, d** The effect of FHC cells pre-educated with HM<sup>+</sup> EVs or HM<sup>-</sup> EVs on the proliferation of HT29 cells was assessed by **(c)** CCK8 and **(d)**

EdU assays. Rel, relative. Scale bar, 100  $\mu\text{m}$ .  $n = 3$  independent experiments. **e, f** The roles of FHC cells pre-educated with  $\text{SM}^+$  EVs or  $\text{SM}^-$  EVs in **(e)** migration and **(f)** invasion of RKO cells were determined by Transwell assays. Rel, relative. Scale bar, 100  $\mu\text{m}$ .  $n = 3$  independent experiments. **g, h** The roles of FHC cells pre-educated with  $\text{HM}^+$  EVs or  $\text{HM}^-$  EVs in **(g)** migration and **(h)** invasion of HT29 cells were also examined by Transwell assays. Rel, relative. Scale bar, 100  $\mu\text{m}$ .  $n = 3$  independent experiments. Data are means  $\pm$  SD. One-way ANOVA with Tukey's multiple comparisons test. Source data are provided as a Source Data file.



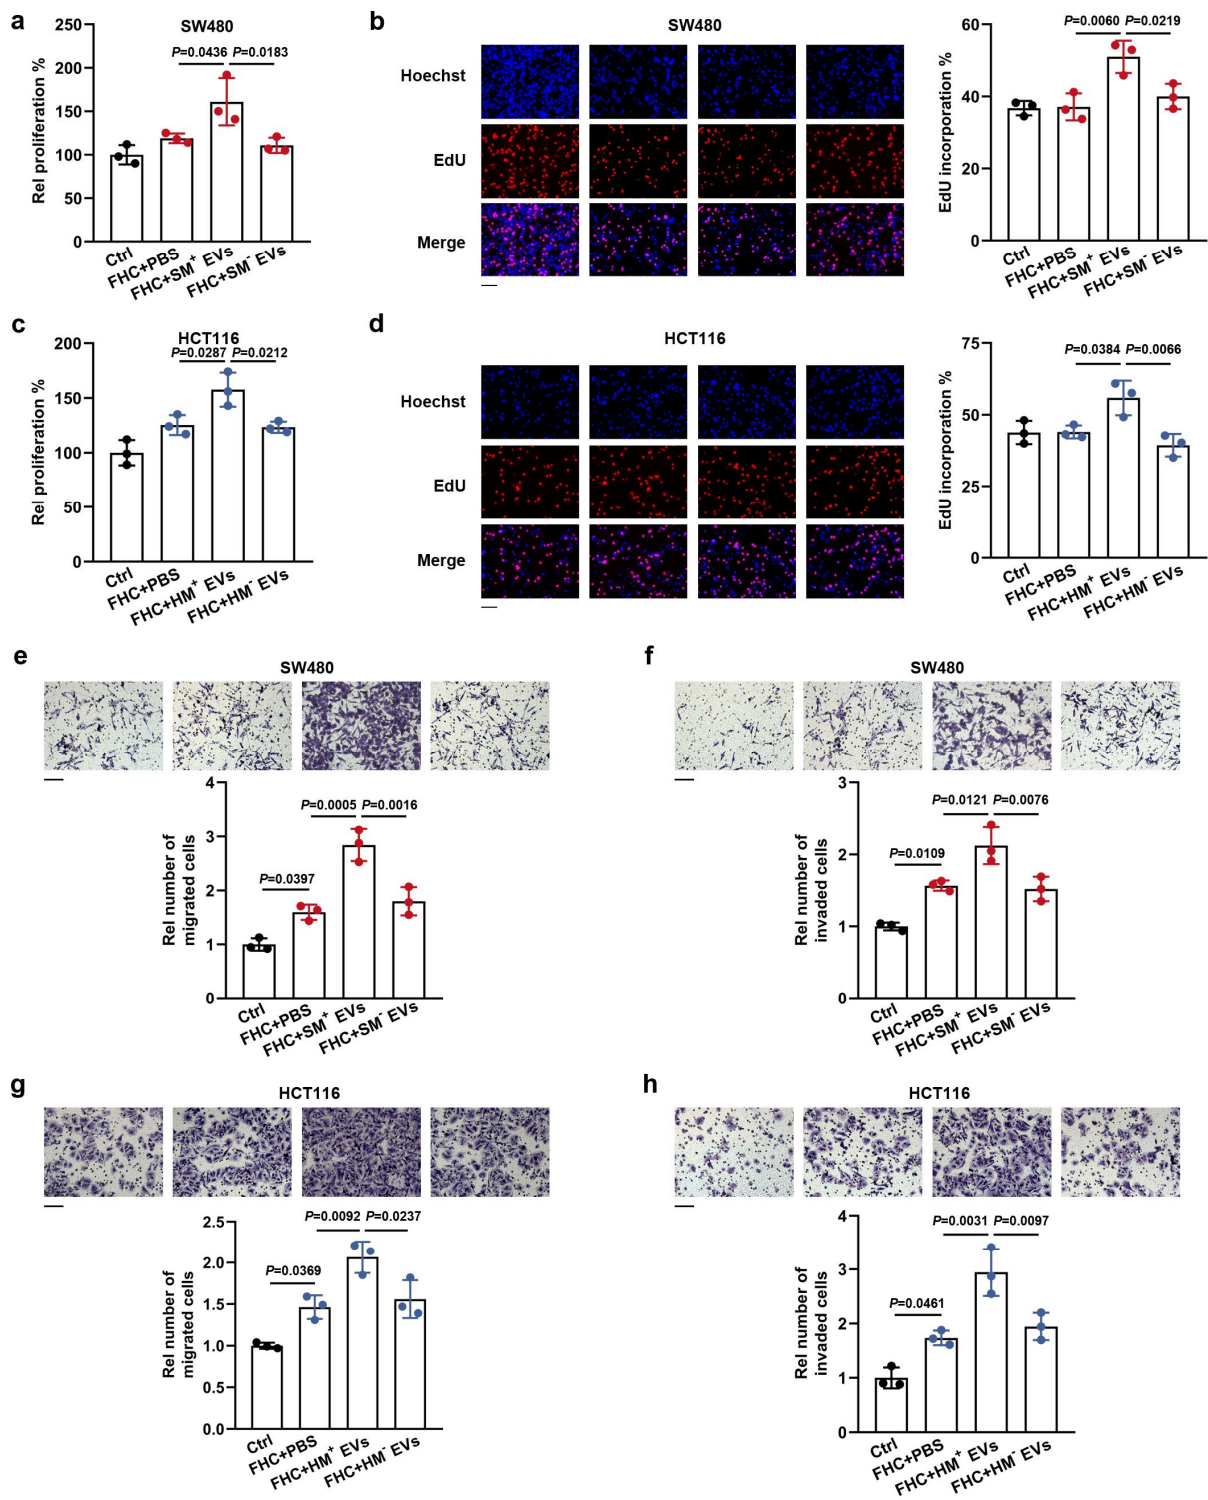

**Supplementary Fig. 11. EV-mtDNA-educated CECs accelerate tumor progression. a, b** The effect of FHC cells pre-educated with SM<sup>+</sup> EVs or SM<sup>-</sup> EVs on the proliferation of SW480 cells was detected by (a) CCK8 and (b) EdU assays. Rel, relative. Scale bar, 100  $\mu$ m. n = 3 independent experiments. **c, d** The effect of FHC cells pre-educated with HM<sup>+</sup> EVs or HM<sup>-</sup> EVs on the proliferation of HCT116 cells was assessed by (c) CCK8 and (d) EdU assays.

Rel, relative. Scale bar, 100  $\mu\text{m}$ .  $n = 3$  independent experiments. **e, f** The roles of FHC cells pre-educated with  $\text{SM}^+$  EVs or  $\text{SM}^-$  EVs in **(e)** migration and **(f)** invasion of SW480 cells were determined by Transwell assays. Rel, relative. Scale bar, 100  $\mu\text{m}$ .  $n = 3$  independent experiments. **g, h** The roles of FHC cells pre-educated with  $\text{HM}^+$  EVs or  $\text{HM}^-$  EVs in **(g)** migration and **(h)** invasion of HCT116 cells were also examined by Transwell assays. Rel, relative. Scale bar, 100  $\mu\text{m}$ .  $n = 3$  independent experiments. Data are means  $\pm$  SD. One-way ANOVA with Tukey's multiple comparisons test. Source data are provided as a Source Data file.

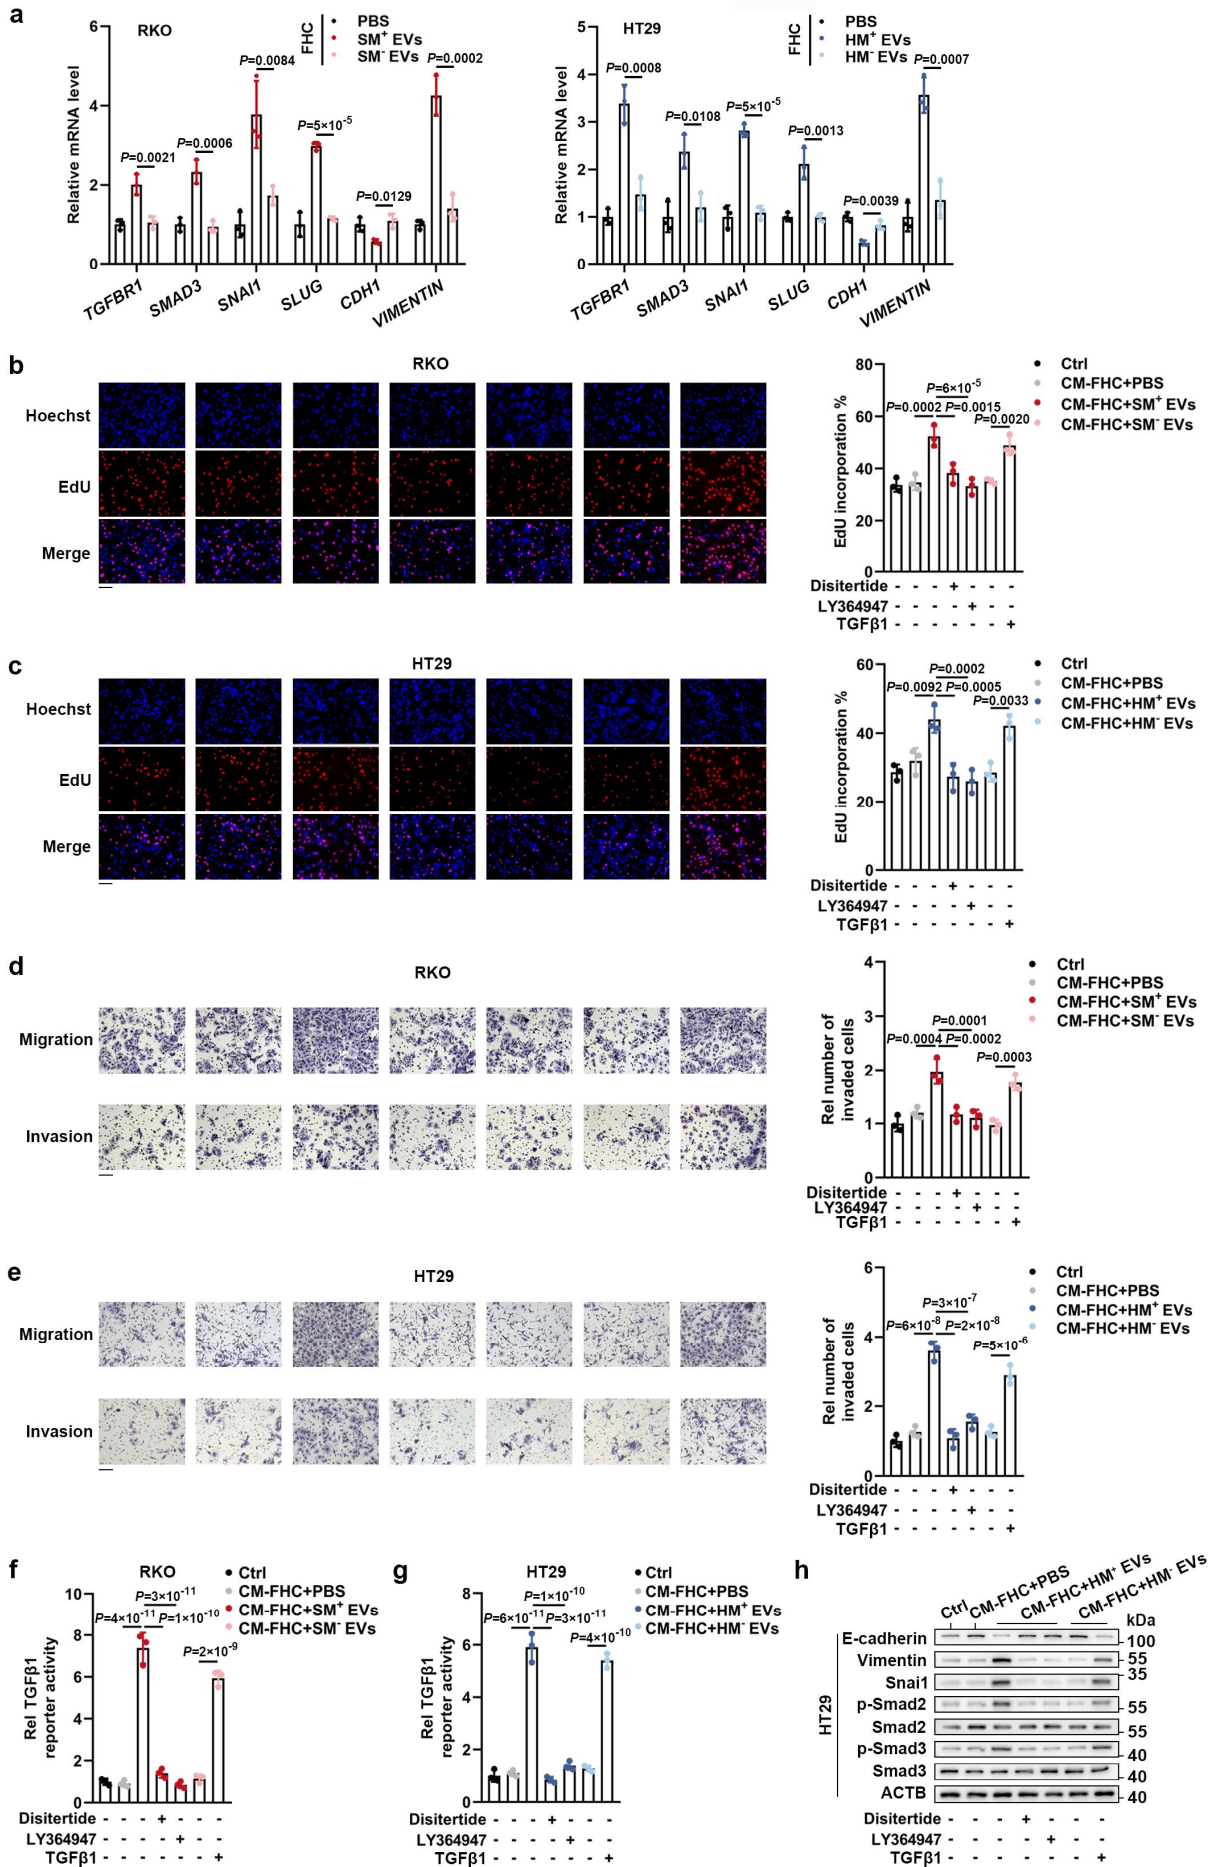

**Supplementary Fig. 12. TGF $\beta$ 1 upregulation in CECs increases tumor malignancy.** **a** RKO and HT29 cells were co-cultured with FHC cells pre-educated with mtDNA-sufficient or mtDNA-depleted EVs. The expression levels of TGF $\beta$ 1-related genes in tumor cells were then determined by qPCR analysis.  $n = 3$  independent experiments. **b, c** **(b)** RKO and **(c)** HT29 cells were incubated with CM from FHC cells pre-treated with mtDNA-rich or mtDNA-depleted EVs, for 48 h. Meanwhile, a subset of RKO and HT29 cells were treated with disitertide (10  $\mu$ M), LY364947 (1  $\mu$ M), or TGF $\beta$ 1 (1 ng mL<sup>-1</sup>). Then, the proliferative abilities of these cells were detected by EdU assays. Scale bar, 100  $\mu$ m.  $n = 3$  independent experiments. **d, e** The migration and invasion abilities of **(d)** RKO and **(e)** HT29 were evaluated by Transwell assays. RKO and HT29 cells were treated as described in **(b, c)**. Rel, relative. Scale bar, 100  $\mu$ m.  $n = 3$  independent experiments. **f, g** TGF $\beta$ 1 reporter plasmids were transfected into CC cells. Then, the luciferase activities in **(f)** RKO and **(g)** HT29 cells were monitored. CC cells were treated as described in **(b, c)**. Rel, relative.  $n = 3$  independent experiments. **h** The levels of phosphorylated Smad2/3 and EMT markers (E-cadherin, Vimentin, Snail) in HT29 cells were detected by immunoblotting. The samples derive from the same experiment but different gels for E-cadherin, Vimentin, and Snail, another for ACTB, p-Smad2, another for Smad2, p-Smad3, and another for Smad3 were processed in parallel. HT29 cells were treated as described in **(c)**. Data are means  $\pm$  SD. One-way ANOVA with Tukey's multiple comparisons test. Source data are provided as a Source Data file.

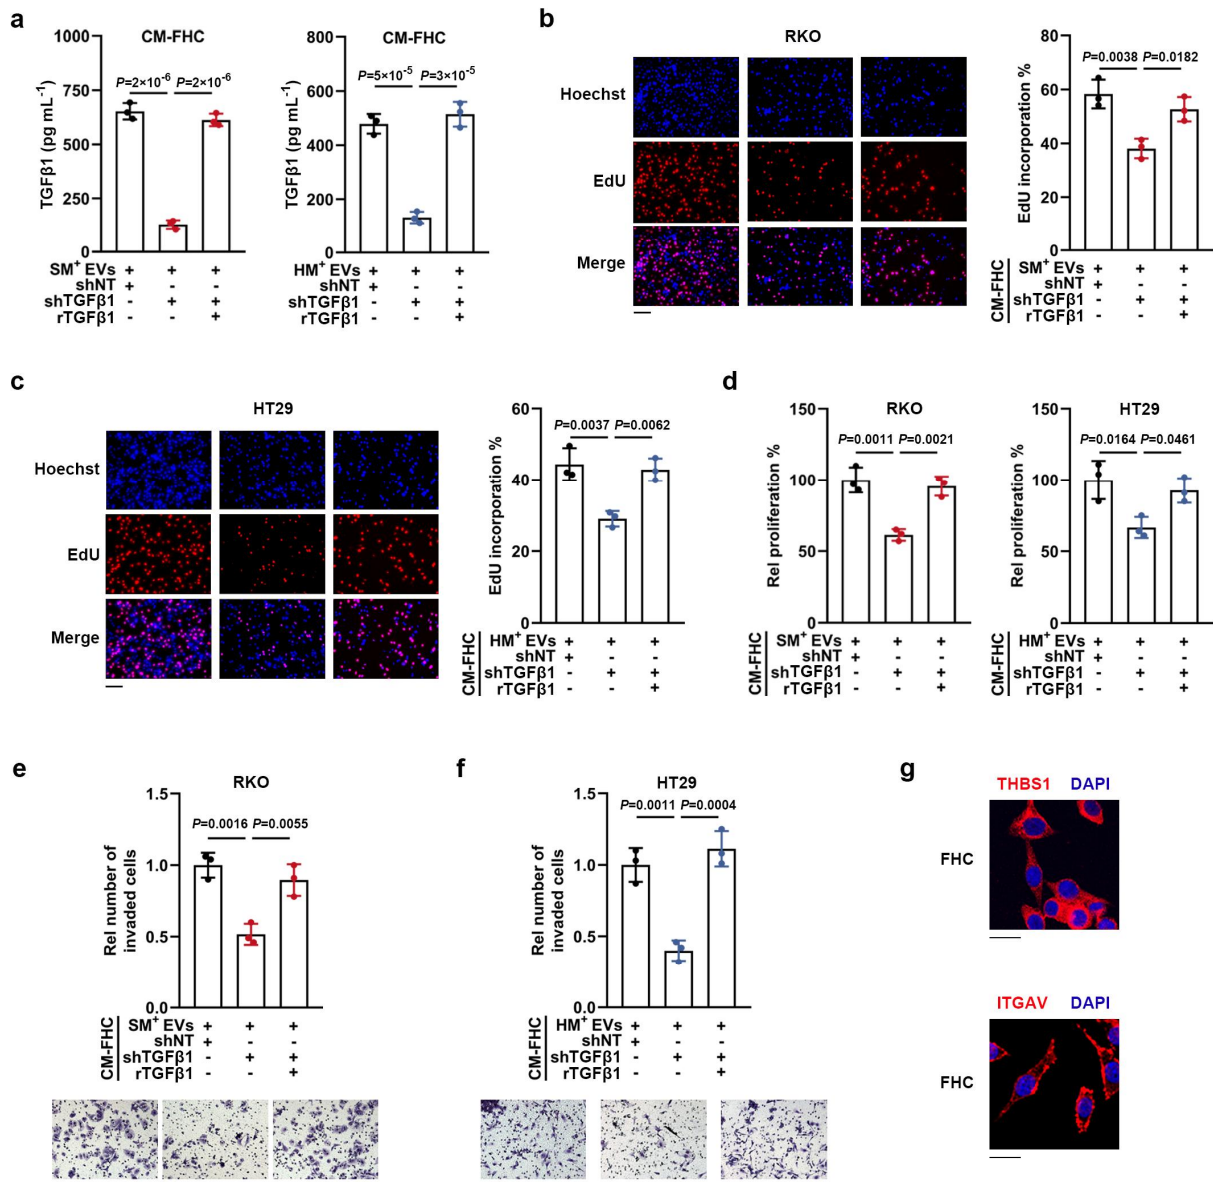

**Supplementary Fig. 13. TGFβ1 increase caused by EV-mtDNA transfer into CECs is responsible for the enhanced malignant phenotype in CC cells.** **a** FHC cells expressing shNT or shTGFβ1 were infected with the lentivirus expressing rTGFβ1, followed by education with SM<sup>+</sup> EVs (left) or HM<sup>+</sup> EVs (right). ELISA assays were performed to detect TGFβ1 levels in CM from FHC cells. n = 3 independent experiments. **b, c** The CM from FHC cells treated as described in (a) was used to incubate (b) RKO and (c) HT29 for 48 h. EdU assays were performed. Scale bar, 100 μm. n = 3 independent experiments. **d** The proliferative abilities of RKO and HT29 cells were also detected by CCK8 assays. Rel, relative. n = 3 independent experiments. **e, f** Transwell invasion assays were performed to

determine the invasion abilities of **(e)** RKO and **(f)** HT29. The CC cells were treated as described in **(b, c)**. Rel, relative. Scale bar, 100  $\mu\text{m}$ .  $n = 3$  independent experiments. **g** Immunofluorescence assays were performed to observe the expression and localization of THBS1 and ITGAV in FHC cells. Scale bar, 20  $\mu\text{m}$ . Data are means  $\pm$  SD. One-way ANOVA with Tukey's multiple comparisons test. Source data are provided as a Source Data file.



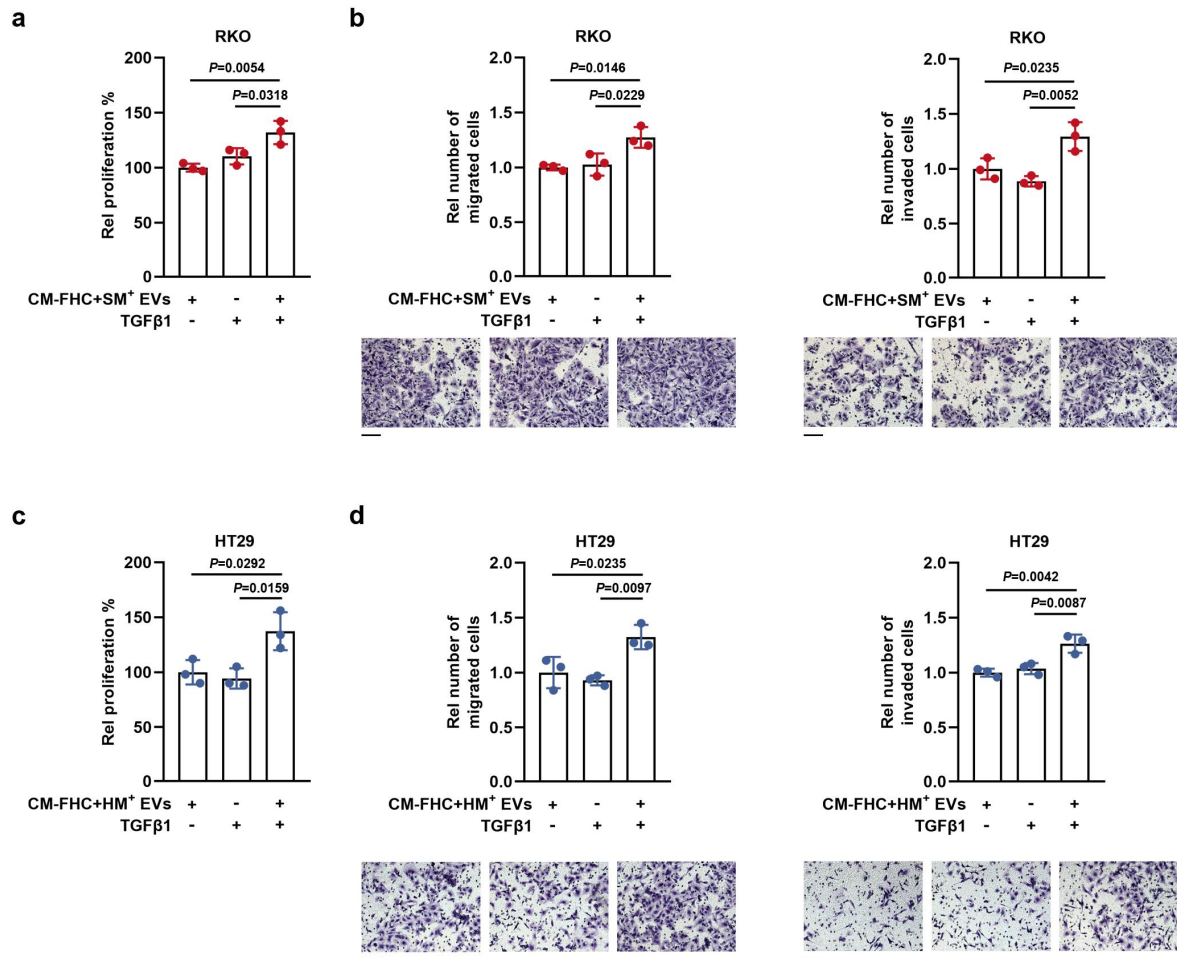

**Supplementary Fig. 14. Exogenous TGFβ1 and EV-mtDNA-educated CECs synergistically promote tumor progression.** **a, b** The effect of exogenous TGFβ1 and EV-mtDNA-educated CECs on proliferation, migration, and invasion of RKO cells was detected by **(a)** CCK8 and **(b)** Transwell assays. Rel, relative. Scale bar, 100 μm. n = 3 independent experiments. **c, d** The effect of exogenous TGFβ1 and EV-mtDNA-educated CECs on proliferation, migration, and invasion of HT29 cells was measured by **(c)** CCK8 and **(d)** Transwell assays. Rel, relative. Scale bar, 100 μm. n = 3 independent experiments. Data are means ± SD. One-way ANOVA with Tukey's multiple comparisons test. Source data are provided as a Source Data file.

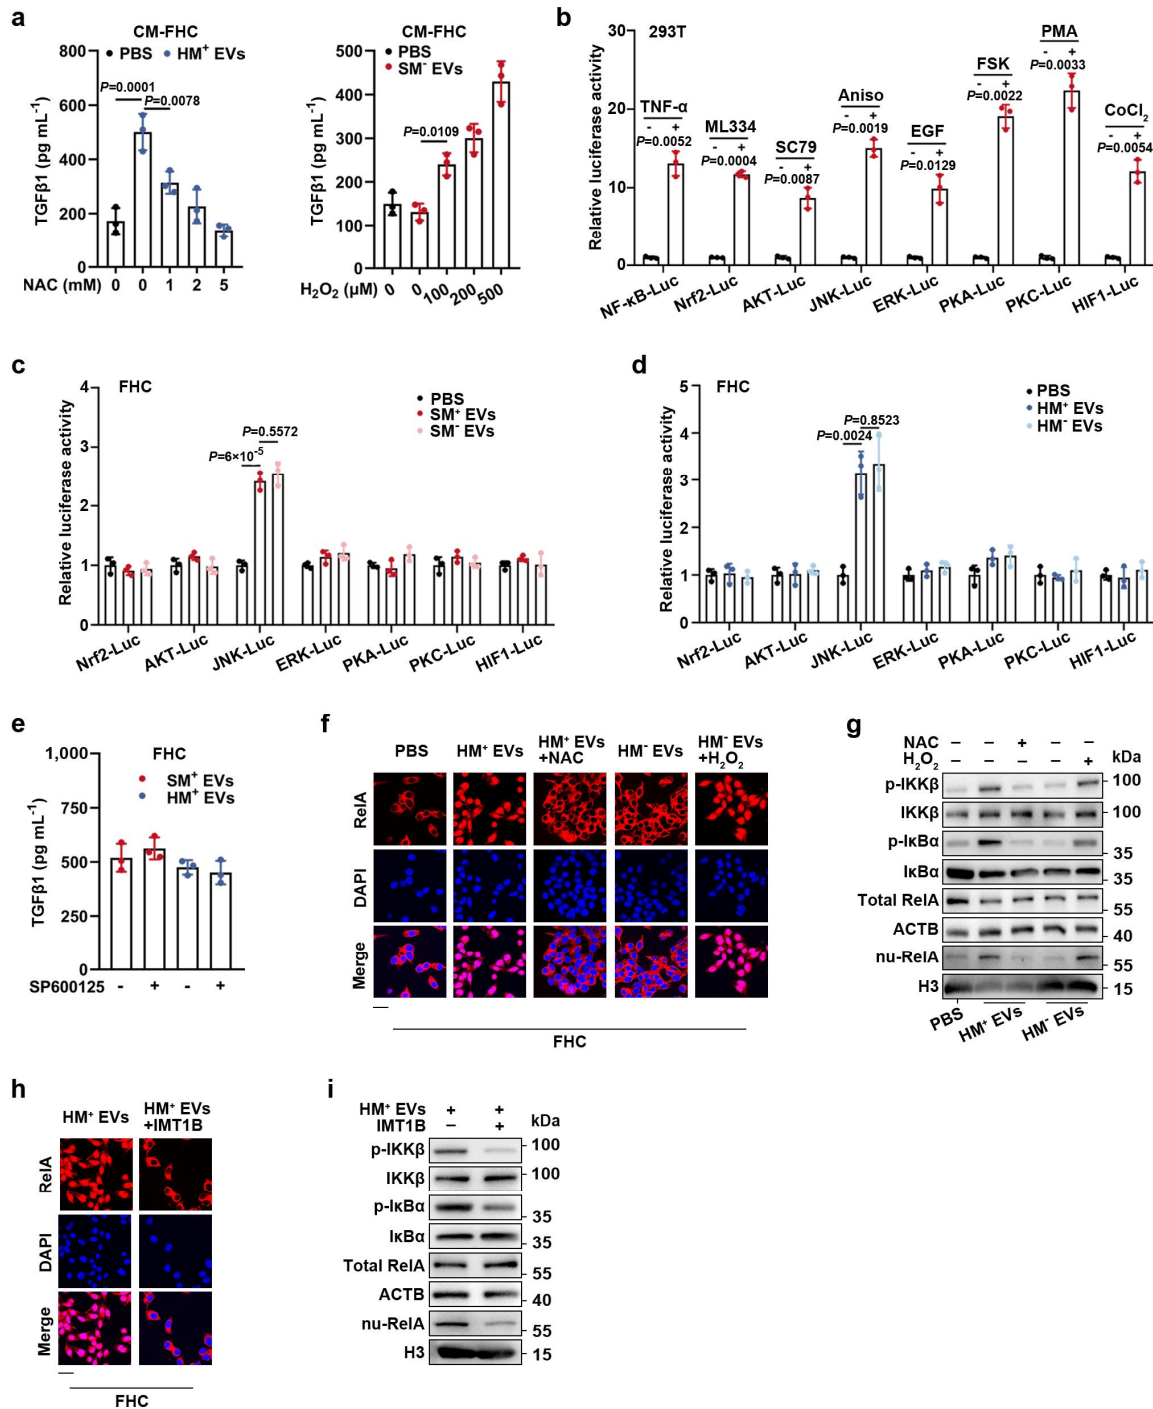

**Supplementary Fig. 15. Increased ROS induced by EV-mtDNA upregulates TGFβ1 expression and activates NF-κB pathway.** **a** ELISA assays were performed to determine TGFβ1 levels in CM from HM<sup>+</sup> EV-educated FHC cells with or without NAC treatment (left). TGFβ1 levels in CM from SM<sup>-</sup> EV-educated FHC cells in the presence or absence of H<sub>2</sub>O<sub>2</sub> stimulation were also detected by ELISA (right). **b** The responsiveness of indicated luciferase reporters were verified in 293T cells, which were



stimulated with TNF- $\alpha$  (30 min, 10 ng mL<sup>-1</sup>), ML334 (12 h, 100  $\mu$ M), SC79 (24 h, 10  $\mu$ M), Anisomycin (24 h, 10  $\mu$ M), EGF (24 h, 50 ng mL<sup>-1</sup>), Forskolin (6 h, 20  $\mu$ M), PMA (12 h, 30 nM), or CoCl<sub>2</sub> (8 h, 150  $\mu$ M). n = 3 independent experiments. **c, d** The luciferase activities were determined in FHC cells educated with EVs derived from **(c)** wild-type/ $\rho$ 0 SW480, or **(d)** wild-type/ $\rho$ 0 HCT116. n = 3 independent experiments. **e** Detection of TGF $\beta$ 1 levels in CM from EV-educated FHC cells in the presence or absence of SP600125 treatment (10  $\mu$ M, 24 h). n = 3 independent experiments. **f, g** A subset of FHC cells educated with HM<sup>+</sup> EVs were treated with NAC (5 mM), and a portion of FHC cells educated with HM<sup>-</sup> EVs were stimulated with H<sub>2</sub>O<sub>2</sub> (500  $\mu$ M). The levels of phosphorylated IKK $\beta$  and I $\kappa$ B $\alpha$ , and nuclear translocation of RelA in FHC cells were detected by **(f)** immunofluorescence and **(g)** immunoblotting. Scale bar, 30  $\mu$ m. **h, i** The levels of phosphorylated IKK $\beta$  and I $\kappa$ B $\alpha$ , and nuclear translocation of RelA in FHC cells were determined by **(h)** immunofluorescence and **(i)** immunoblotting. FHC cells were educated with HM<sup>+</sup> EVs, followed by stimulation with or without IMT1B (1  $\mu$ M). Scale bar, 30  $\mu$ m. As shown in **(g, i)**, the total protein samples derive from the same experiment but different gels for IKK $\beta$ , p-I $\kappa$ B $\alpha$ , and another for p-IKK $\beta$ , total RelA, ACTB, and I $\kappa$ B $\alpha$  were processed in parallel. The nuclear protein samples for detecting nu-RelA and H3 were processed on the same gel. Data are means  $\pm$  SD. Two-tailed t test (**b, e**). One-way ANOVA with Tukey's multiple comparisons test (**a, c, and d**). Source data are provided as a Source Data file.

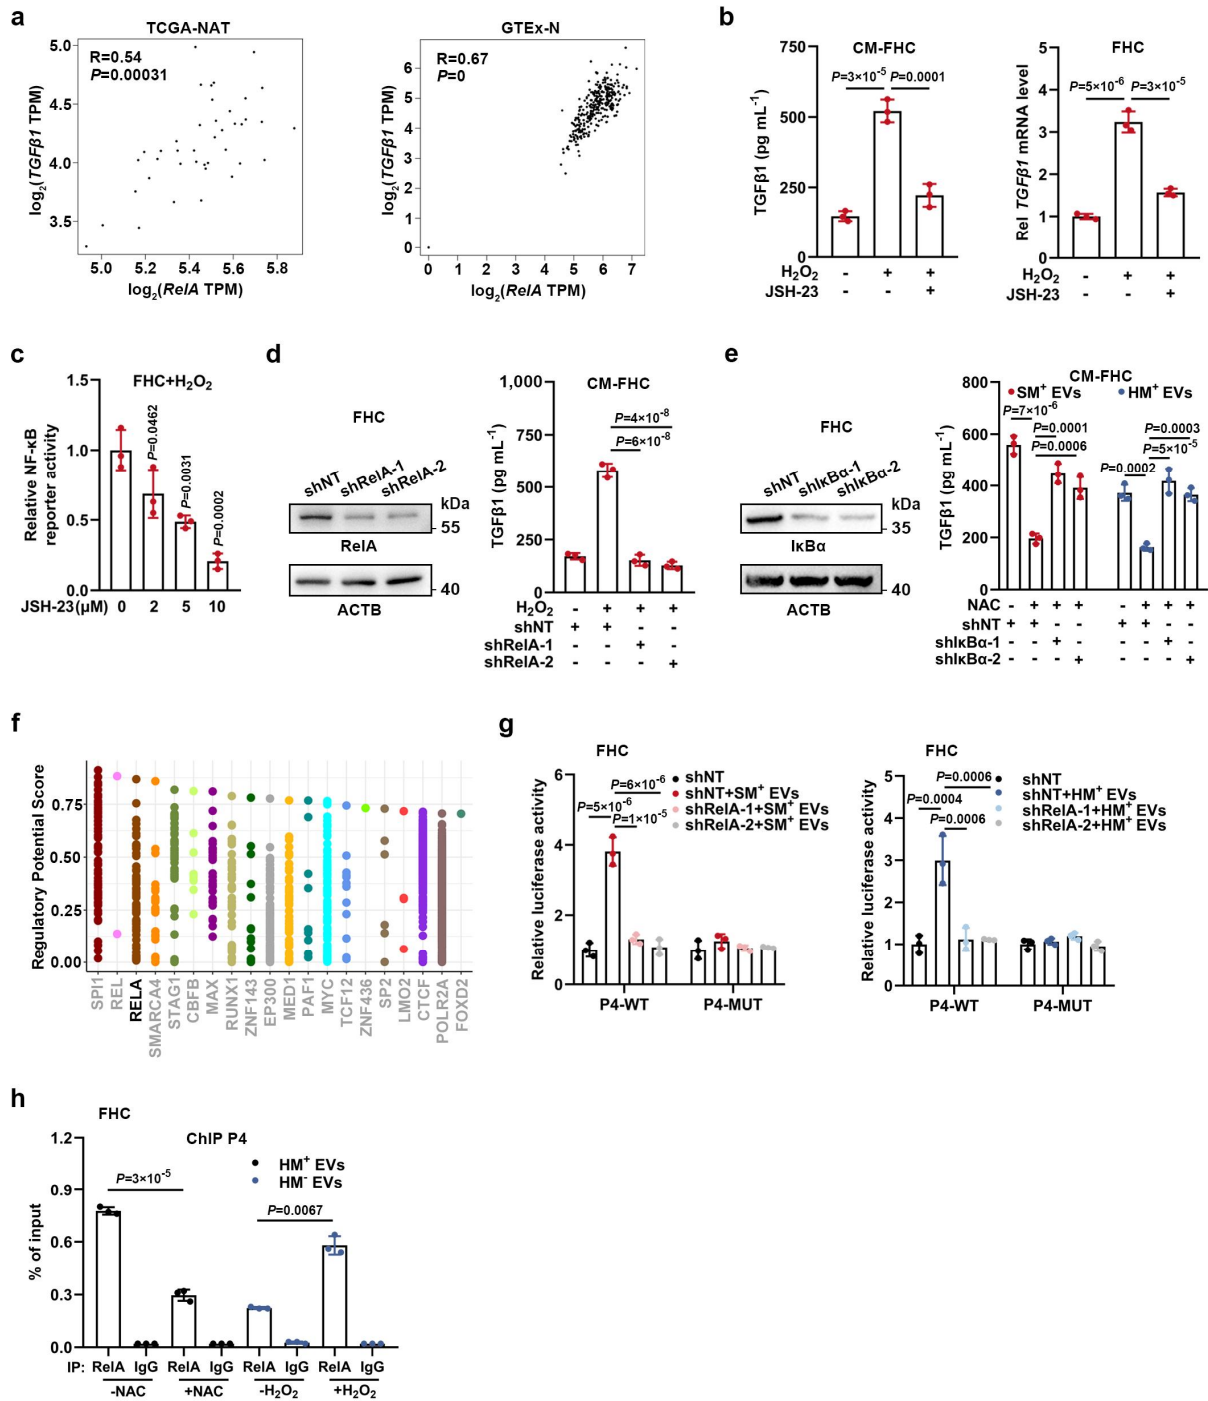

**Supplementary Fig. 16. Nuclear translocation of RelA driven by ROS accelerates transcription of *TGFβ1* via interaction with *TGFβ1* promoter.** **a** TCGA and GTEX RNA-sequencing data were analyzed to describe the correlation between *RelA* and *TGFβ1* in NAT or completely normal colonic mucosa using Pearson correlation analysis. **b** The effect of the NF-κB pathway on *TGFβ1* expression at both protein and mRNA levels was evaluated in  $H_2O_2$ -stimulated FHC cells in the presence or absence of 10- $\mu$ M JSH-23 treatment. Rel,

relative. n = 3 independent experiments. **c** The inhibitory effect of JSH-23 on the NF- $\kappa$ B pathway was verified. n = 3 independent experiments. **d** FHC cells expressing shNT or shRelA were stimulated with H<sub>2</sub>O<sub>2</sub>. TGF $\beta$ 1 protein levels were then detected. The samples were derived from the same experiment and processed on the same gel. n = 3 biological replicates. **e** EV-educated FHC cells expressing shNT or shI $\kappa$ B $\alpha$  were treated with NAC. Subsequently, TGF $\beta$ 1 protein levels were determined. The samples were derived from the same experiment and processed on the same gel. n = 3 biological replicates. **f** ChIP-seq data from public databases were analyzed to reveal the potential interaction between RelA and *TGF $\beta$ 1* promoter. **g** Luciferase reporter plasmids containing the wild-type or mutant RelA binding site P4 were transfected into FHC cells stably expressing shNT or shRelA. Then, the luciferase activities were detected after indicated EV treatment. n = 3 biological replicates. **h** ChIP assays were performed to examine RelA enrichment on P4 in NAC- or H<sub>2</sub>O<sub>2</sub>-treated FHC cells educated with indicated EVs. n = 3 independent experiments. Data are means  $\pm$  SD. Two-tailed t test (**h**). One-way ANOVA with Tukey's multiple comparisons test (**b-e, g**). Source data are provided as a Source Data file.

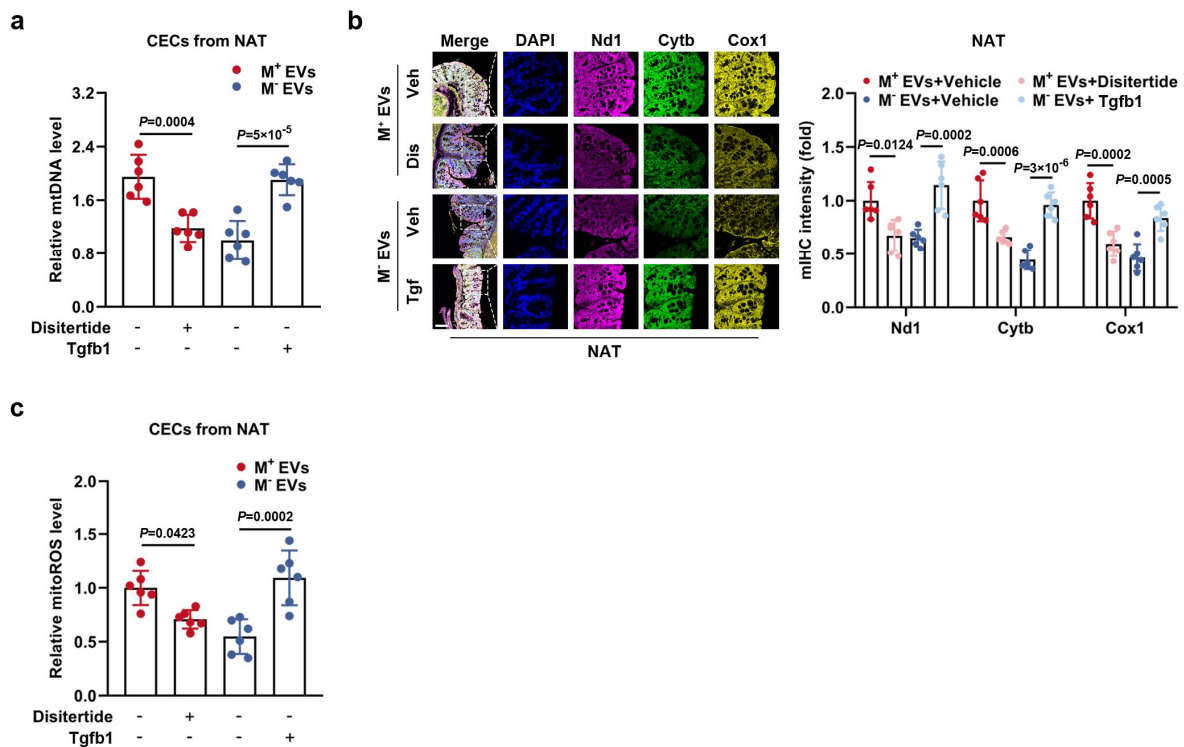

**Supplementary Fig. 17. TGFβ1-dependent tumor progression enhanced OXPHOS phenotype in adjacent CECs.** **a** The mtDNA content in CECs isolated from NAT of murine orthotopic CC model receiving indicated treatment were detected. n = 6 mice per group. **b** Representative images (left) of mIHC staining for DAPI (blue), Nd1 (magenta), Cytb (green), and Cox1 (yellow) in sections from NAT of murine orthotopic CC model receiving indicated treatment. Scale bar, 100 μm. The co-expression levels of these mitochondrial proteins were then determined by the quantification of fluorescent intensity (right). Veh, Vehicle; Dis, Disitertide; Tgf, Tgfb1. n = 6 mice per group. **c** Detection of the mitochondrial ROS levels in CECs isolated from NAT of murine orthotopic CC model receiving indicated treatment. n = 6 mice per group. Data are means ± SD. One-way ANOVA with Tukey's multiple comparisons test. Source data are provided as a Source Data file.

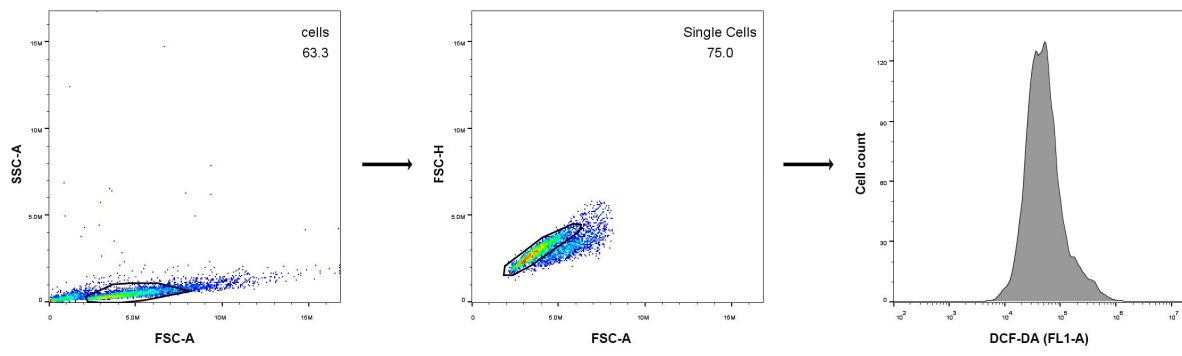

This figure exemplifies the gating strategy used for Flow cytometry analysis.

**Supplementary Table 1 Relationships between serum EV-mtDNA level and clinical factors in 82 colon cancer patients**

| Characteristics              | No. of patients (%) | Serum EV-mtDNA level |                 | <i>P</i> |
|------------------------------|---------------------|----------------------|-----------------|----------|
|                              |                     | Low n = 41 (%)       | High n = 41 (%) |          |
| <b>Age</b>                   |                     |                      |                 |          |
| <65                          | 26 (31.7)           | 14 (17.1)            | 12 (14.6)       | 0.635    |
| ≥65                          | 56 (68.3)           | 27 (32.9)            | 29 (35.4)       |          |
| <b>Gender</b>                |                     |                      |                 |          |
| Female                       | 32 (39.0)           | 17 (20.7)            | 15 (18.3)       | 0.651    |
| Male                         | 50 (61.0)           | 24 (29.3)            | 26 (31.7)       |          |
| <b>Location</b>              |                     |                      |                 |          |
| Left                         | 45 (54.9)           | 22 (26.8)            | 23 (28.0)       | 0.824    |
| Right                        | 37 (45.1)           | 19 (23.2)            | 18 (22.0)       |          |
| <b>pT stage</b>              |                     |                      |                 |          |
| T1                           | 6 (7.3)             | 5 (6.1)              | 1 (1.2)         | 0.010    |
| T2                           | 9 (11.0)            | 8 (9.8)              | 1 (1.2)         |          |
| T3                           | 53 (64.6)           | 21 (25.6)            | 32 (39.0)       |          |
| T4                           | 14 (17.1)           | 7 (8.5)              | 7 (8.5)         |          |
| <b>Lymph node metastasis</b> |                     |                      |                 |          |
| N0                           | 40 (48.8)           | 25 (30.5)            | 15 (18.3)       | 0.047    |
| N1                           | 27 (32.9)           | 12 (14.6)            | 15 (18.3)       |          |
| N2                           | 15 (18.3)           | 4 (4.9)              | 11 (13.4)       |          |
| <b>Distant metastasis</b>    |                     |                      |                 |          |
| M0                           | 62 (75.6)           | 36 (43.9)            | 26 (31.7)       | 0.010    |
| M1                           | 20 (24.4)           | 5 (6.1)              | 15 (18.3)       |          |
| <b>AJCC stage</b>            |                     |                      |                 |          |
| I                            | 13 (15.9)           | 12 (14.6)            | 1 (1.2)         | 0.002    |
| II                           | 24 (29.3)           | 13 (15.9)            | 11 (13.4)       |          |
| III                          | 25 (30.5)           | 11 (13.4)            | 14 (17.1)       |          |
| IV                           | 20 (24.4)           | 5 (6.1)              | 15 (18.3)       |          |
| <b>Differentiation</b>       |                     |                      |                 |          |
| Well-moderate                | 67 (81.7)           | 33 (40.2)            | 34 (41.5)       | 0.775    |
| Poor                         | 15 (18.3)           | 8 (9.8)              | 7 (8.5)         |          |

The two-sided Chi-square test was used.

**Supplementary Table 2 Details of the antibodies used in this study**

| <b>Primary antibody</b>   | <b>Concentration</b>                     | <b>Specificity</b>               | <b>Company</b>                     |
|---------------------------|------------------------------------------|----------------------------------|------------------------------------|
| CD63                      | 1:500 (IB)                               | Rabbit polyclonal                | Proteintech (25682-1-AP)           |
| CD9                       | 1:2,000 (IB)                             | Rabbit polyclonal                | Proteintech (20597-1-AP)           |
| TSG101                    | 1:10,000 (IB)                            | Rabbit polyclonal                | Proteintech (28283-1-AP)           |
| Calnexin                  | 1:5,000 (IB)                             | Rabbit polyclonal                | Proteintech (10427-2-AP)           |
| ALIX                      | 1:20,000 (IB)                            | Rabbit polyclonal                | Proteintech (12422-1-AP)           |
| GM130                     | 1:10,000 (IB)                            | Rabbit polyclonal                | Proteintech (11308-1-AP)           |
| ACTB                      | 1:5,000 (IB)                             | Rabbit polyclonal                | Proteintech (20536-1-AP)           |
| H3                        | 1:10,000 (IB)                            | Rabbit polyclonal                | Proteintech (17168-1-AP)           |
| TFAM                      | 1:20,000 (IB)                            | Rabbit polyclonal                | Proteintech (22586-1-AP)           |
| RelA                      | 1:1,000 (IB);1:100 (ChIP);<br>1:800 (IF) | Rabbit monoclonal (D14E12)       | Cell Signaling Technology (#8242)  |
| THBS1                     | 1:100 (IF)                               | Rabbit monoclonal (EPR22927-54)  | Abcam (ab267388)                   |
| ITGAV                     | 1:500 (IF)                               | Rabbit monoclonal (EPR16800)     | Abcam (ab179475)                   |
| IKK $\beta$               | 1:1,000 (IB)                             | Rabbit monoclonal (D30C6)        | Cell Signaling Technology (#8943)  |
| p-IKK $\beta$             | 1:500 (IB)                               | Rabbit polyclonal                | ABclonal (AP1237)                  |
| I $\kappa$ B $\alpha$     | 1:1,000 (IB)                             | Rabbit monoclonal (44D4)         | Cell Signaling Technology (#4812)  |
| p-I $\kappa$ B $\alpha$   | 1:1,000 (IB)                             | Rabbit monoclonal (14D4)         | Cell Signaling Technology (#2859)  |
| ND1                       | 1:1,000 (IB);1:1,000 (mIHC)              | Rabbit polyclonal                | ABclonal (A17967)                  |
| CYTB                      | 1:1,000 (IB);1:1,000 (mIHC)              | Rabbit polyclonal                | ABclonal (A17966)                  |
| COX1                      | 1:500 (IB);1:2,000 (mIHC)                | Rabbit polyclonal                | ABclonal (A17889)                  |
| ATP5A1                    | 1:5,000 (IB)                             | Rabbit polyclonal                | Proteintech (14676-1-AP)           |
| SDHA                      | 1:5,000 (IB)                             | Rabbit polyclonal                | Proteintech (14865-1-AP)           |
| Smad2                     | 1:1,000 (IB)                             | Rabbit monoclonal (D43B4)        | Cell Signaling Technology (#5339)  |
| p-Smad2                   | 1:1,000 (IB)                             | Rabbit monoclonal (E8F3R)        | Cell Signaling Technology (#18338) |
| Smad3                     | 1:1,000 (IB)                             | Rabbit monoclonal (C67H9)        | Cell Signaling Technology (#9523)  |
| p-Smad3                   | 1:1,000 (IB)                             | Rabbit monoclonal (C25A9)        | Cell Signaling Technology (#9520)  |
| E-cadherin                | 1:1,000 (IB);1:2,000 (mIHC)              | Rabbit monoclonal (24E10)        | Cell Signaling Technology (#3195)  |
| Vimentin                  | 1:1,000 (IB);1:1,000 (mIHC)              | Rabbit polyclonal                | ABclonal (A2584)                   |
| Snai1                     | 1:1,000 (IB);1:500 (mIHC)                | Rabbit polyclonal                | ABclonal (A5243)                   |
| TIM23                     | 1:2,000 (IB)                             | Rabbit polyclonal                | Proteintech (11123-1-AP)           |
| HNRNPU                    | 1:5,000 (IB)                             | Rabbit polyclonal                | Proteintech (14599-1-AP)           |
| Cleaved-PARP              | 1:1,000 (IB)                             | Rabbit monoclonal (D64E10)       | Cell Signaling Technology (#5625)  |
| Cleaved-Caspase3          | 1:1,000 (IB)                             | Rabbit monoclonal (5A1E)         | Cell Signaling Technology (#9664)  |
| Calreticulin              | 1:1,000 (IB)                             | Rabbit polyclonal                | Proteintech (10292-1-AP)           |
| F4/80                     | 1:20,000 (mIHC)                          | Rabbit polyclonal                | Proteintech (29414-1-AP)           |
| Ly6G                      | 1:5,000 (mIHC)                           | Rabbit monoclonal (EPR22909-135) | Abcam (ab238132)                   |
| Epcam                     | 1:1,000 (IF)                             | Rabbit polyclonal                | Proteintech (21050-1-AP)           |
| <b>Secondary antibody</b> | <b>Concentration</b>                     | <b>Specificity</b>               | <b>Company</b>                     |
| CY3-conjugated            | 1:200 (IF)                               | goat anti-rabbit IgG             | Affinity Biosciences (#S0011)      |
| HRP-conjugated            | 1:5,000 (IB)                             | goat anti-rabbit IgG             | Affinity Biosciences (#S0001)      |
| HRP-conjugated            | ready-to-use (mIHC)                      | goat anti-rabbit IgG             | Panovue (10079100050)              |

IB: immunoblotting; mIHC: multiplex immunohistochemistry; IF: immunofluorescence  
ChIP: chromatin immunoprecipitation

**Supplementary Table 3 Primers for qPCR**

| Gene                   | Sequence                        |                               |
|------------------------|---------------------------------|-------------------------------|
| <i>TGFβ1</i> (cDNA)    | F 5'CTCGCCCTGTACAACAGCAC3'      | R 5'GGGTTTCCACCATTAGCAC3'     |
| <i>ACTB</i> (cDNA)     | F 5'ACAGAGCCTCGCCTTTGCC3'       | R 5'TGGGGTACTTCAGGGTGAGG3'    |
| <i>ND1</i> (mtDNA)     | F 5'ATATACAACACTACGCAAAGGCC3'   | R 5'TGGTAGATGTGGCGGGTTT3'     |
| <i>ACTB</i> (gDNA)     | F 5'CCGTGCTCGATGGGGTACTT3'      | R 5'CAGGGCTTCTTGTCCTTTCCTTC3' |
| <i>Tgfb1</i> (cDNA)    | F 5'CTTCAATACGTCAGACATTCGGG3'   | R 5'GTAACGCCAGGAATTGTTGCTA3'  |
| <i>Actb</i> (cDNA)     | F 5'CCACCATGTACCCAGGCATT3'      | R 5'CAGCTCAGTAACAGTCCGCC3'    |
| <i>Nd4</i> (mtDNA)     | F 5'TCGCCTACTCCTCAGTTAGCCACA3'  | R 5'TGATGATGTGAGGCCATGTGCGA3' |
| <i>Rps18</i> (gDNA)    | F 5'TGTGTTAGGGGACTGGTGGACA3'    | R 5'CATCACCCACTTACCCCCAAAA3'  |
| ChIP-P4                | F 5'CATCTCCCTCCCACCTCCCT3'      | R 5'TGCTCCTCGGCGACTCCTT3'     |
| <i>TGFBR1</i> (cDNA)   | F 5'ACGGCGTTACAGTGTTCCTG3'      | R 5'GCACATACAAACGGCCTATCTC3'  |
| <i>SMAD3</i> (cDNA)    | F 5'CCATCTCCTACTACGAGCTGAA3'    | R 5'CACTGCTGCATTCTGTTGAC3'    |
| <i>SNAIL</i> (cDNA)    | F 5'TCGGAAGCCTAACTACAGCGA3'     | R 5'AGATGAGCATTGGCAGCGAG3'    |
| <i>SLUG</i> (cDNA)     | F 5'CGAACTGGACACACATACAGTG3'    | R 5'CTGAGGATCTCTGGTTGTGGT3'   |
| <i>CDH1</i> (cDNA)     | F 5'ATTTTTCCCTCGACACCCGAT3'     | R 5'TCCCAGGCGTAGACCAAGA3'     |
| <i>VIMENTIN</i> (cDNA) | F 5'TGCCGTTGAAGCTGCTAACTA3'     | R 5'CCAGAGGGAGTGAATCCAGATTA3' |
| <i>ND1</i> (cDNA)      | F 5'ATCAAACCTCAAACACTACGCCCTG3' | R 5'TGTTGTGATAAGGGTGGAGAGG3'  |
| <i>ND3</i> (cDNA)      | F 5'GAAAAATCCACCCCTTACGAGTG3'   | R 5'TTGTTTGTAGGGCTCATGGTAGG3' |
| <i>NDUFV1</i> (cDNA)   | F 5'TGACTGGTACAAGACAAAGGAGA3'   | R 5'TGCCATCTGAGGGCTTATTCA3'   |
| <i>NDUFS2</i> (cDNA)   | F 5'GTCCGATTGCCGATTCAGC3'       | R 5'GCTTGGGTACATAACAGCTCC3'   |
| <i>SDHA</i> (cDNA)     | F 5'CAGCATGTGTTACCAAGCTGT3'     | R 5'GGTGTTCGTAGAAATGCCACCT3'  |
| <i>SDHB</i> (cDNA)     | F 5'ACAGCTCCCCGTATCAAGAAA3'     | R 5'GCATGATCTTCGGAAGGTCAA3'   |
| <i>CYTB</i> (cDNA)     | F 5'ACAATTATACCCTAGCCAACCC3'    | R 5'TGGATAGTAATAGGGCAAGGACG3' |
| <i>UQCRC1</i> (cDNA)   | F 5'GGGGCACAAGTGCTATTGC3'       | R 5'GTTGTCCAGCAGGCTAACC3'     |
| <i>COX1</i> (cDNA)     | F 5'CACGAGCATATTTACCTCCG3'      | R 5'TTCATATTGCTTCCGTGGAGTG3'  |
| <i>COX2</i> (cDNA)     | F 5'TCCTAGTCCTGTATGCCCTTTTC3'   | R 5'GTAAAGGATGCGTAGGGATGG3'   |
| <i>COX4I1</i> (cDNA)   | F 5'GGCGGCAGAATGTTGGCTA3'       | R 5'AGCTCGTACACACACAGAGG3'    |
| <i>COX6A1</i> (cDNA)   | F 5'GGTAGTTGGTGTGTCCTCGG3'      | R 5'TGGTGCGACTTCAGGTACAC3'    |



## Supplementary Table 4 Primers for mtDNA identification

| Human Mitochondrial Primers  |                                            |                                           |
|------------------------------|--------------------------------------------|-------------------------------------------|
| 45 amplicons                 | Sequence                                   |                                           |
| 1                            | F 5'CACCCTATTAACCACTCACG3'                 | R 5'TGAGATTAGTAGTATGGGAG3'                |
| 2                            | F 5'ACAAAGAACCCTAACACCAGC3'                | R 5'ACTTGGGTTAATCGTGTGACC3'               |
| 3                            | F 5'CATCAAGCACGCAGCAATG3'                  | R 5'AATCCACCTTCGACCCCTAAG3'               |
| 4                            | F 5'CTCACCACCTCTTGCTCAGC3'                 | R 5'GCCAGGTTTCAATTTCTATCG3'               |
| 5                            | F 5'TGCACTTGAGCGAACCCAGAG3'                | R 5'TGTTGAGCTTGAACGCTTTC3'                |
| 6                            | F 5'GAGGAACAGCTCTTTGGACAC3'                | R 5'AGAGACAGCTGAACCCCTCGTG3'              |
| 7                            | F 5'CACTGTCAACCCAACACAGG3'                 | R 5'ATGTCTGATCCAACATCGAG3'                |
| 8                            | F 5'CCCAACCTCCGAGCAGTACATG3'               | R 5'AGAAGAGCGATGGTGAGAGC3'                |
| 9                            | F 5'ACTACAACCCCTTCGCTGACG3'                | R 5'TGAAGCCTGAGACTAGTTCGG3'               |
| 10                           | F 5'GCCTAGCCGTTTACTCAATCC3'                | R 5'TGAGTTGGTCGTAGCGGAATC3'               |
| 11                           | F 5'TCAGGCTTCAACATCGAATACG3'               | R 5'TTATGGTTCATTGTCCGGAGAG3'              |
| 12                           | F 5'TTGGTTATACCCTTCCCGTAC3'                | R 5'GTTTAATCCACCTCAACTGCC3'               |
| 13                           | F 5'CCCTTTCACCTCTGAGTCCAG3'                | R 5'AGGGCTTTGAAGGCTTTG3'                  |
| 14                           | F 5'CACCATCACCTCCTTAACC3'                  | R 5'GCTGAGTGAAGCATTGGACTG3'               |
| 15                           | F 5'TAAGCACCTAATCAACTGGC3'                 | R 5'GCCTCCACTATAGCAGATGCG3'               |
| 16                           | F 5'CTCTAAGCCTCCTTATTCGAGC3'               | R 5'ATAGTGATGCCAGCAGCTAGG3'               |
| 17                           | F 5'GCCATAACCCAATACCAAACG3'                | R 5'TGGGCTACAACGTAGTACGTG3'               |
| 18                           | F 5'GGCTTCTAGGGTTTATCGTG3'                 | R 5'TTTCATGTGGTGTATGCATCG3'               |
| 19                           | F 5'GAGGCTTCATTCAGTGATTTCC3'               | R 5'GGGCAGGATAGTTCAGACGG3'                |
| 20                           | F 5'TATCACCTTTCATGATCACGC3'                | R 5'GACGATGGGCATGAAACTG3'                 |
| 21                           | F 5'TGAACCTACGAGTACACCGACTAC3'             | R 5'AAGTTAGCTTTACAGTGGGCTCTAG3'           |
| 22                           | F 5'CGGTCAATGCTCTGAAATCTGTG3'              | R 5'CATTGTTGGGTGGTGATTAGTCG3'             |
| 23                           | F 5'CTGTTCGCTTCATTCATTGCC3'                | R 5'GTGGCGCTTCCAATTAGGTG3'                |
| 24                           | F 5'CCCACCTTACCACAAGGC3'                   | R 5'TGTGCTTTCCTGTTACATCG3'                |
| 25                           | F 5'TTCACTTCCACTCCATAACGC3'                | R 5'GAAAGTTGAGCCAATAATGACG3'              |
| 26                           | F 5'AGTCTCCCTTACCATTTCGG3'                 | R 5'AAAGGAGGGCAATTTCTAGATC3'              |
| 27                           | F 5'ACTACCACAACTCAACGGCTAC3'               | R 5'GGAGGATATGAGGTGTGAGCG3'               |
| 28                           | F 5'GGATTAGACTGAACCGAATTGG3'               | R 5'CATCGGGTGATGATAGCCAAG3'               |
| 29                           | F 5'GTCTCAATCTCCAACACATATGG3'              | R 5'TGTTGTGAGTGTAAATTAGTGCG3'             |
| 30                           | F 5'AACGCCACTATCCAGTGAACC3'                | R 5'CTGTTTGTCTGAGGCAGATGG3'               |
| 31                           | F 5'GACTCCCTAAAGCCCATGTGCG3'               | R 5'TTGATCAGGAGAACGTGGTTAC3'              |
| 32                           | F 5'ACGAACGCACTCACAGTCG3'                  | R 5'AAGCCTCTGTTGTCAGATTCAC3'              |
| 33                           | F 5'TGCTAGTAACCACGTTCTCCTG3'               | R 5'GATATCGCCGATACGGTTG3'                 |
| 34                           | F 5'TTCAATCCCTGTAGCATTGTTCCG3'             | R 5'AGCGGATGAGTAAGAAGATTCC3'              |
| 35                           | F 5'TTGCTCATCAGTTGATGATACG3'               | R 5'TTGAAGAAGGCGTGGGTACAG3'               |
| 36                           | F 5'CACTCTGTTTCGACGAGTCTG3'                | R 5'TCGAGTGCTATAGGCGCTTGTC3'              |
| 37                           | F 5'CATCATCGAAACCGCAAAC3'                  | R 5'TGTGATGCTAGGGTAGAATCCG3'              |
| 38                           | F 5'TTTCTCCAACATACTCGGATTC3'               | R 5'TTAGCGATGGAGGTAGGATTGG3'              |
| 39                           | F 5'ACAAACAATGTTCAACCAGTAAC3'              | R 5'TGAGGCGTCTGGTGAGTAGTGC3'              |
| 40                           | F 5'TCCAAAGACAACCATCATTCC3'                | R 5'CGTGAAGGTAGCGGATGATTC3'               |
| 41                           | F 5'TACTCACGACGCCTCAAC3'                   | R 5'TTATCGGAATGGGAGGTGATTC3'              |
| 42                           | F 5'AGTCCCACCTCACACGATTC3'                 | R 5'ACTGGTTGTCTCCGATTCAGG3'               |
| 43                           | F 5'CGCCTACACAATTCTCCGATC3'                | R 5'CGGTTGTTGATGGGTGAGTGC3'               |
| 44                           | F 5'TTAATCCACCATAGCACC3'                   | R 5'GCGAGGAGAGTAGCACTCTTG3'               |
| 45                           | F 5'TACATTACTGCCAGCCACCATG3'               | R 5'TTAAGTGCTGTGGCCAGAAG3'                |
| Long-range PCR               | Sequence                                   |                                           |
| LRP1                         | F 5'ACATAGCACATTACAGTCAAATCCCTTCTCGTCCCC3' | R 5'TGAGATTGTTTGGGCTACTGCTCGCAGTGC3'      |
| LRP2                         | F 5'TACTCAATCCTCTGATCAGGGTGAGCATCAAACCT3'  | R 5'GCTTGGATTAAGGCACAGCGATTTCTAGGATAGT3'  |
| LRP3                         | F 5'TCATTTTTATTGCCACAACCTCCTCGGACTC3'      | R 5'CGTGATGTCTTATTTAAGGGGAACGTGTGGGCTAT3' |
| Murine Mitochondrial Primers |                                            |                                           |
| Gene                         | Sequence                                   |                                           |
| <i>Cox3</i>                  | F 5'ATGACCCACAAACTCATGC3'                  | R 5'AGTATCATGCTGCGGCTTC3'                 |
| <i>Cytb</i>                  | F 5'CTCATTATTGACCTACCTGCC3'                | R 5'AGTATGAGATGGAGGCTAGTTGG3'             |
| <i>Nd2</i>                   | F 5'ATAAATCCTATCACCTTGCCATC3'              | R 5'CTAGGTAATTAGTTGGGGGGCTAG3'            |
