# Supplementary material for: Mitochondrial genome transfer drives metabolic reprogramming in adjacent colonic epithelial cells promoting TGFβ1-mediated tumor progression
Source: PubMed Central journal article supplement (PMC11061154; doi:10.1038/s41467-024-48100-y), 2024-04-30
Supplement: 41467_2024_48100_MOESM3_ESM.pdf [file 41467_2024_48100_MOESM3_ESM.pdf]

## **Description of Additional Supplementary Files**

**File Name:** Supplementary Data 1

Description: GSEA report of our RNA-sequencing data based on hallmark gene sets. GSEA was performed using a two-sided permutation test.

**File Name:** Supplementary Data 2

Description: The report of our RNA-sequencing data using KEGG pathway enrichment analysis based on a two-sided hypergeometric test.
